1 **BNT162b2 induced neutralizing and non-neutralizing antibody functions against**  
2 **SARSCoV-2 diminish with age**

3

4 Timothy A. Bates<sup>#1</sup>, Pei Lu<sup>#2</sup>, Ye jin Kang<sup>2</sup>, Devin Schoen<sup>3</sup>, Micah Thornton<sup>4</sup>, Savannah K.

5 McBride<sup>1</sup>, Chanhee Park<sup>4</sup>, Daehwan Kim<sup>4</sup>, William B. Messer<sup>1</sup>, Marcel E. Curlin<sup>\*3</sup>, Fikadu G.

6 Tafesse<sup>\*1</sup>, Lenette L. Lu<sup>\*2, 5, 6</sup>

7

8 1. Department of Molecular Microbiology and Immunology, Oregon Health and Sciences

9 University, Portland, OR

10 2. Division of Infectious Diseases and Geographic Medicine, Department of Internal Medicine,

11 UT Southwestern Medical Center, Dallas, TX

12 3. Department of Occupational Health, Oregon Health and Sciences University, Portland, OR

13 4. Lyda Hill Department of Bioinformatics, UT Southwestern Medical Center, Dallas, TX

14 5. Department of Immunology, UT Southwestern Medical Center, Dallas, TX

15 6. Parkland Health & Hospital System

16 # These authors contributed equally.

17

18 \*Correspondence:

19 Lenette Lu MD PhD

20 [Lenette.Lu@UTSouthwestern.edu](mailto:Lenette.Lu@UTSouthwestern.edu)

21 UT Southwestern Medical Center

22 5323 Harry Hines Blvd, Dallas, TX 75390

23 214-645-1486

24

25 Fikadu G. Tafesse PhD – [tafesse@ohsu.edu](mailto:tafesse@ohsu.edu)

26 Marcel E Curlin MD – [curlin@ohsu.edu](mailto:curlin@ohsu.edu)

## 27 **Abstract**

28 Each novel SARS-CoV-2 variant renews concerns about decreased vaccine efficacy caused by  
29 evasion of vaccine induced neutralizing antibodies. However, accumulating epidemiological  
30 data show that while vaccine prevention of infection varies, protection from severe disease and  
31 death remains high. Thus, immune responses beyond neutralization could contribute to vaccine  
32 efficacy. Polyclonal antibodies function through their Fab domains that neutralize virus directly,  
33 and Fc domains that induce non-neutralizing host responses via engagement of Fc receptors on  
34 immune cells. To understand how vaccine induced neutralizing and non-neutralizing activities  
35 synergize to promote protection, we leverage sera from 51 SARS-CoV-2 uninfected health-care  
36 workers after two doses of the BNT162b2 mRNA vaccine. We show that BNT162b2 elicits  
37 antibodies that neutralize clinical isolates of wildtype and five variants of SARS-CoV-2, including  
38 Omicron BA.2, and, critically, induce Fc effector functions. FcγRIIIa/CD16 activity is linked to  
39 neutralizing activity and associated with post-translational afucosylation and sialylation of  
40 vaccine specific antibodies. Further, neutralizing and non-neutralizing functions diminish with  
41 age, with limited polyfunctional breadth, magnitude and coordination observed in those ≥65  
42 years old compared to <65. Thus, studying Fc functions in addition to Fab mediated  
43 neutralization provides greater insight into vaccine efficacy for vulnerable populations such as  
44 the elderly against SARS-CoV-2 and novel variants.

45

## 46 **Introduction**

47 Neutralizing antibody responses are among the core measures of vaccine efficacy in the  
48 COVID-19 pandemic (Garcia-Beltran et al., 2022; Liu et al., 2021). Yet even when neutralization  
49 is compromised in the setting of new SARS-CoV-2 variants (Planas et al., 2022) and cases of  
50 vaccine breakthrough infections rise, protection from hospitalization remains relatively high  
51 (Altarawneh et al., 2022; Collie et al., 2022; Nasreen et al., 2022; Tang et al., 2021). Thus, the

52 continued emergence of new variants highlights the need to understand vaccine efficacy  
53 through protection from disease in addition to prevention of infection.

54  
55 Though one of the key components of immune protection, the complexity of polyclonal antibody  
56 responses and its roles in disease remain only partially understood. For SARS-CoV-2, attention  
57 has focused on leveraging direct neutralization of virus by antigen recognition via the Fab  
58 domain. However, the overall magnitude of neutralizing responses in patients with severe  
59 COVID-19 is higher compared to mild disease, suggesting that neutralizing activity alone poorly  
60 captures the capacity to protect from serious illness (Lucas et al., 2021; Savage et al., 2021).

61 Independently, data from multiple large clinical trials have demonstrated that convalescent  
62 plasma carrying neutralizing activity does not prevent infection or disease in humans (Begin et  
63 al., 2021; Group, 2021; Writing Committee for the et al., 2021), suggesting that passive transfer  
64 of neutralizing polyclonal antibodies is insufficient to confer protection. These lines of evidence  
65 show that in SARS-CoV-2 infection, more nuanced evaluations of neutralizing responses with  
66 respect to potency (Garcia-Beltran et al., 2021) and dynamics (Lucas et al., 2021), and immune  
67 responses beyond neutralization are vital in understanding pathogenesis.

68  
69 Antibodies function through the combination of the Fab domain that directs neutralizing activity  
70 against microbial targets and the Fc domain that induces non-neutralizing functions (Lu et al.,  
71 2018). Through binding Fc receptors expressed on innate and adaptive immune cells as well as  
72 activation of complement, antibody Fc domains have the ability to induce a spectrum of host  
73 responses directed against an antigen recognized by the Fab domain (Pincetic et al., 2014).  
74 Thus, antibody Fc effector functions have the potential to impact outcomes of SARS-CoV-2  
75 infection and protection in vaccines.

76

77 Studies using monoclonal antibodies targeting SARS-CoV-2 show that Fc effector functions can  
78 be protective. Passive transfer of monoclonal antibodies with mutations that abrogate Fc  
79 domain binding to Fc receptors result in increased SARS-CoV-2 viral load and decreased  
80 survival in multiple animal models when compared to intact antibodies (Schafer et al., 2021;  
81 Suryadevara et al., 2021; Ullah et al., 2021; Yamin et al., 2021). This effect is more pronounced  
82 with therapeutic than prophylactic administration (Winkler et al., 2021). Thus, monoclonal  
83 antibody Fc functions support neutralizing activity to prevent viral entry. Moreover, even after  
84 viral infection, Fc functions can inhibit disease progression.

85  
86 Conversely, several lines of evidence show that Fc effector functions in polyclonal responses  
87 during SARS-CoV-2 infection could be pathogenic. Post-translational IgG glycosylation is  
88 altered with disease severity in many ways (Farkash et al., 2021; Petrovic et al., 2021; Vicente  
89 et al., 2022) but one consistent observation across several studies is that decreased IgG  
90 fucosylation correlates with worsening clinical symptoms and hospitalization (Chakraborty et al.,  
91 2021; Chakraborty et al., 2022; Larsen et al., 2021). The proposed mechanism of pathology is  
92 through increased binding to the activating Fc receptor FcγRIIIa/CD16a. In an *in vitro* poly I:C  
93 stimulated human macrophage model with FcγRIIIa/CD16a expression, addition of afucosylated  
94 compared to fucosylated IgG from patients infected with SARS-CoV-2 enhances secretion of  
95 the pro-inflammatory cytokine IL-6 (Hoepel et al., 2021; Larsen et al., 2021). In monocytes,  
96 FcγR mediated activation can cause pyroptosis (Junqueira et al., 2022). In a human Fc receptor  
97 transgenic mouse model, passive transfer of afucosylated polyclonal IgG from individuals with  
98 severe COVID-19 increases production of IL-6 and TNF $\alpha$  but not the anti-inflammatory IL-10  
99 (Chakraborty et al., 2022). Consistent with these data, FcγRIIIa/CD16a natural killer (NK) cell  
100 activation that leads to antibody dependent cellular cytotoxicity (ADCC) is enhanced with  
101 symptom severity and normalizes upon convalescence (Chakraborty et al., 2021). The low

102 affinity activating Fc $\gamma$ RIIa/CD32a and inhibitory Fc $\gamma$ RIIb/CD32b along with the high affinity  
103 Fc $\gamma$ RI/CD64 mediate the non-neutralizing Fc effector functions of antibody dependent cellular  
104 phagocytosis (ADCP) by monocytes. Neutrophils express antibody receptors for both IgG, the  
105 activating high affinity Fc $\gamma$ RI, low affinity Fc $\gamma$ RIIa and Fc $\gamma$ RIIIB, as well as IgA, the low affinity  
106 Fc $\alpha$ RI. These, along with complement receptors CR1 and CR3 contribute to neutrophil  
107 phagocytosis. Finally, C1q binding to IgG and IgM Fc domains activate complement pathways  
108 through C3 deposition (Lofano et al., 2018; Peschke et al., 2017; Quast et al., 2015; van Osch  
109 et al., 2021). In contrast to Fc $\gamma$ RIIIa/CD16a activities, the implications of Fc $\gamma$ RIIa/CD32a and  
110 Fc $\gamma$ RIIb/CD32b mediated phagocytosis and complement activation in SARS-CoV-2 are less  
111 clear given the variability in cohort populations with respect to clinical outcomes, demographics  
112 and co-morbidities (Adeniji et al., 2021; Bartsch et al., 2021; Herman et al., 2021; Klingler et al.,  
113 2021; Selva et al., 2021). However, that multiple Fc effector functions in infection and disease  
114 are detectable suggest that these responses if induced by vaccines could influence outcomes.  
115  
116 For COVID-19 vaccines, neutralizing titers are often used to extrapolate protective efficacy  
117 (Lustig et al., 2021). While antibody dependent NK cell activation (ADNKA), ADCC, ADCP by  
118 monocytes, ADNP by neutrophils and complement activation are also elicited (Alter et al., 2021;  
119 Gorman et al., 2021; Kaplonek et al., 2022), it is unclear whether these Fc effector functions are  
120 protective, inert, or pathogenic. Moreover, how non-neutralizing antibody functions impact direct  
121 neutralization of live virus is not known. To assess the relationships between Fab and Fc  
122 domain functions in polyclonal responses from vaccination, we evaluated immune sera from  
123 SARS-CoV-2 uninfected health-care workers who received two doses of the BNT162b2 mRNA  
124 vaccine. We assessed neutralization against SARS-CoV-2 wildtype virus (WA.1) and five  
125 clinical variants: Alpha (B.1.1.7), Beta (B.1.351), Gamma (P.1), Delta (B.1.617.2) and Omicron  
126 (BA.2). We measured vaccine specific antibody Fc features of isotype, Fc receptor binding, Fc

127 effector functions and IgG glycosylation. We found heterogeneous neutralizing and non-  
128 neutralizing antibody responses. Neutralization across variants correlated with FcγRIIIa/CD16a  
129 effector functions in an age but not sex dependent manner. Post-translational afucosylation and  
130 sialylation of vaccine specific antibodies associated with enhanced FcγRIIIa/CD16a activity.  
131 Neutralizing and non-neutralizing functions independently and collectively diminished with age,  
132 limiting polyfunctional breadth, magnitude, and coordination in those ≥65 years old compared to  
133 <65. Our results show that assessment of vaccine efficacy against SARS-CoV-2 and novel  
134 variants is enhanced by the addition of diverse Fc functions to traditional Fab functions,  
135 particularly in vulnerable populations such as the elderly.

136

## 137 **Results**

### 138 Study subjects

139 To evaluate polyclonal antibody responses to mRNA COVID-19 vaccines, sera were collected  
140 from 51 adults who received two doses of BNT162b2 vaccine between December 2020 and  
141 February 2021 (Table) (Bates et al., 2021a). These individuals spanned a spectrum of ages  
142 from 21-82 years. To limit confounding variables, samples were selected to minimize variations  
143 in time between vaccine dose 1 and 2 (20-22 days, variation of 2 days) and dose 2 to sample  
144 collection (14-15 days, variation of 1 day); sex distribution was balanced. To avoid the  
145 complicating factor of hybrid immunity due to SARS-CoV-2 infection, we excluded individuals  
146 with report of prior infection or active symptoms and performed confirmatory testing to verify the  
147 absence of detectable SARS-CoV-2 nucleocapsid specific antibodies (Supplemental Figure 1A).

148

### 149 Neutralizing antibody titers of wildtype and SARS-CoV-2 variants

150 Using the SARS-CoV-2 receptor binding domain (RBD) antigen encoded by BNT162b2 (Vogel  
151 et al., 2021), we found that 100% of individuals after two doses of the vaccine had detectable  
152 antigen specific IgG compared to 51% with IgA (Supplemental Figure 1A). Thus, consistent with

153 other studies, the primary isotype mediating antibody function two weeks after a second  
154 BNT162b2 dose was IgG (Brewer et al., 2022; Collier et al., 2021). To assess direct  
155 neutralization, we performed focus reduction neutralization tests using live wildtype SARS-CoV-  
156 2 (isolate WA1/2020) virus (Supplemental Figure 1B). Consistent with the generation of RBD  
157 specific IgG, all individuals had detectable capacity to neutralizing activity. Linear regression  
158 showed that neutralization was dependent on RBD specific antibodies, specifically IgG and not  
159 IgA (Figure 1A).

160  
161 We next measured the neutralizing activity of vaccinee sera against SARS-CoV-2 clinical  
162 isolates of the viral variants Alpha (B.1.1.7), Beta (B.1.351), Gamma (P.1), Delta (B.1.617.2)  
163 and Omicron (BA.2), (Wang et al., 2022) (Supplemental Figure 1B). We used live virus instead  
164 of pseudovirus to more effectively model physiological ratios and spectrum of SARs-CoV-2  
165 antigens during infection and replication (Syed et al., 2021). We found that neutralization of  
166 variants was diminished relative to wildtype and varied by viral variant and individual (Figure 1B)  
167 with the lowest levels detected against Omicron (BA.2), consistent with other studies (Evans et  
168 al., 2022; Kurhade et al., 2022; Wang et al., 2022). More specifically, while all individuals had  
169 detectable neutralization against wildtype and Alpha (B.1.1.7), only 57% had detectable  
170 responses against Omicron (BA.2) which were lower on average than for other variants. While  
171 sex can impact immune responses (Scully et al., 2020), we observed no sex based difference in  
172 neutralization. (Supplemental Figure 1C). However, we did detect a negative correlation  
173 between age and neutralization (Supplemental Figure 1D). To incorporate both age and sex into  
174 our evaluations, we used multivariable regression to assess the relationships with neutralization.  
175 We found that neutralization of wildtype and variants was negatively correlated with age (Figure  
176 1C-H) but the correlation with sex remained non-significant. Upon review of the 43% of  
177 individuals with no detectable neutralizing activity against Omicron (BA.2), we observed that the  
178 median age of this subgroup was 63.5 years, above the median age of 50 for all individuals in

179 this study. Consistent with other reports, these data showed that BNT162b2 induced RBD IgG  
180 neutralized SARS-CoV-2 wildtype virus and multiple variants in an age but not sex dependent  
181 manner (Bates et al., 2021a; Collier et al., 2021; Kawasuji et al., 2021).

182

### 183 Vaccine specific Fc effector functions

184 Because IgG was the predominant vaccine specific isotype, we focused on RBD specific IgG  
185 effector functions to evaluate the relationship between viral neutralization via by the Fab domain  
186 and non-neutralizing Fc activity. We began by measuring RBD specific antibody binding to the  
187 activating receptors, FcγRIIIa/CD16a and FcγRIIa/CD32a, and the sole inhibitory receptor,  
188 FcγRIIb/CD32b, because engagement of these low affinity Fc receptors are modifiable by  
189 dynamic changes in subclass and post-translational glycosylation (Alter et al., 2018;  
190 Nimmerjahn and Ravetch, 2005; Pincetic et al., 2014). We found that RBD specific IgG binding  
191 to FcγRIIIa/CD16a (Figure 2A), FcγRIIa/CD32a (Figure 2B) and FcγRIIb/CD32b (Figure 2C)  
192 positively correlated with SARS-CoV-2 neutralization in varying degrees.

193

194 Because Fc domain engagement is only the first step in signaling and initiation of effector  
195 functions, we examined the downstream consequences of activation by measuring RBD antibody  
196 dependent natural killer cell activation (ADNKA) which leads to antibody dependent cellular  
197 cytotoxicity (ADCC) (Chung et al., 2015), antibody dependent cellular and neutrophil phagocytosis  
198 (ADCP and ADNP) and antibody dependent complement deposition (ADCD). We found that  
199 neutralization titers positively correlated with all three markers of ADNKA: CD107a degranulation  
200 and intracellular IFNγ and TNFα production (Figure 2D-F). This association was not observed  
201 with ADNP (Figure 2G) and ADCP (Supplemental Figure 2A) and was less statistically significant  
202 with C3 deposition in ADCD (Supplemental Figure 2A). Because the primary Fc receptor that  
203 induces ADNKA is FcγRIIIa/CD16a, these findings corroborated data with respect to binding  
204 (Figure 2A). In contrast, the combinatorial engagement of low and high affinity FcγRs and the



205 Fc $\alpha$ R on neutrophils in ADNP did not correlate with neutralization (Figure 2G). Along these lines,  
206 the ratio of activating Fc $\gamma$ RIIa/CD32a and, to a lesser degree, Fc $\gamma$ RIIIa/CD16a, to the inhibitory  
207 Fc $\gamma$ RIIb/CD32b involved in ADCP in THP-1 monocytes did not relate to neutralization  
208 (Supplemental Figure 2A and Figure 2H). The link between Fc $\gamma$ RIIIa/CD16a NK cell activation  
209 and neutralization was sustained across variants, though fits again varied (Figure 2H and  
210 Supplemental Figure 2B). These data together demonstrated that in contrast to Fc $\gamma$ RIIa/CD32a  
211 and Fc $\gamma$ RIIb/CD32b, vaccine specific IgG induction of Fc $\gamma$ RIIIa/CD16a functions associated with  
212 neutralization.

213

#### 214 IgG glycosylation

215 As in many infectious and non-infectious processes, post-translational glycosylation of polyclonal  
216 IgG has been shown to mediate binding affinity to Fc receptors in SARS-CoV-2 infection  
217 (Chakraborty et al., 2021; Chakraborty et al., 2022; Hoepel et al., 2021; Larsen et al., 2021). A  
218 core biantennary structure on the conserved asparagine residue N297 on the Fc domain is  
219 modified by the addition and subtraction of galactose (G), sialic acid (S), fucose (F) and bisecting  
220 N-acetylglucosamine (GlcNAc) to generate glycoform diversity (Arnold et al., 2007)  
221 (Supplemental Figure 3A). Monoclonal and polyclonal antibody studies have shown that changes  
222 in glycoform composition have the potential to impact binding and downstream effector functions  
223 (Supplemental Figure 3A) (Alter et al., 2018; Arnold et al., 2007; Peschke et al., 2017; Quast et  
224 al., 2015; van Osch et al., 2021). To evaluate the impact of glycosylation on vaccine induced  
225 antibodies, we measured the relative abundance of N-glycans on total non-antigen and RBD  
226 specific IgG (Supplemental Figure 3B). For each individual, non-antigen compared to RBD  
227 specific IgG glycoforms were distinct (Figure 3A and 3B). Glycoforms (Supplemental Figure 3C)  
228 containing fucose (Figure 3C), total sialic (Figure 3D) composed of di-sialic (Figure 3E) and mono-  
229 sialic (Figure 3F) acids, galactose (di-galactosylated in Figure 3G and agalactosylated and mono-

230 galactosylated in Supplemental Figure 3D) and bisecting GlcNAc (Supplemental Figure 3E) were  
231 significantly different between total non-antigen and RBD specific IgG.

232  
233 To evaluate if differential antibody glycosylation impacted effector functions associated with  
234 neutralization, we investigated which glycoforms lead to FcγRIIIa/CD16a mediated NK cell  
235 activation by linear regression. We found that relative levels of RBD and not total non-antigen  
236 specific IgG glycoforms significantly correlated with CD107a degranulation, intracellular IFN $\gamma$  and  
237 TNF $\alpha$  production at varying levels (Supplemental Figure 4A-D). Relative levels of IgG glycoforms  
238 that contained fucose without sialic acid (asialylated fucosylated) and glycoforms that contained  
239 sialic acid (specifically di-sialic and not mono-sialic acid) correlated with all three markers of NK  
240 cell activation (Figure 3H-K). The negative relationship between asialylated fucosylated species  
241 on RBD specific IgG with ADNKA indicated an inhibitory effect of the presence of fucose. This  
242 contrasted with sialic acid, where the absence negatively (Figure 3H and Supplemental Figure  
243 4E and H) and presence positively (Figure 3I and J and Supplemental Figure 4 F-G, I-J)  
244 associated with ADNKA. Taken together, these data showed that fucose and sialic acid on  
245 vaccine specific IgG influence FcγRIIIa/CD16a NK cell activation in opposing manners.

246  
247 Impact of age on antibody Fc effector functions

248 We next investigated if Fc domain features were dependent on age as we had observed with Fab  
249 domain mediated neutralization. We observed a negative relationship between RBD specific IgG  
250 binding to FcγRIIIa/CD16a, FcγRIIa/CD32a and FcγRIIb/CD32b with age (Figure 4 A-C) by linear  
251 regression taking sex into account (Figure 4D). In contrast, no statistically significant relationships  
252 between age and Fc receptor binding to antibodies targeting control antigens from other  
253 pulmonary viruses respiratory syncytial virus (RSV) and influenza (Flu) and the negative control  
254 *Bacillus anthracis* (Anthrax) were seen (Figure 4D). Consistent with neutralization data, we  
255 observed that age negatively correlated with RBD specific IgG mediated NK cell CD107a

256 degranulation (Figure 4E) and intracellular IFN $\gamma$  and TNF $\alpha$  production at varying levels  
257 (Supplemental Figure 5 and Figure 4F). In comparison, the relationships between age and RBD  
258 specific ADCP (Figure 4G), ADNP (Figure 4H) as well as ADCD (Supplemental Figure 5) were  
259 non-significant. Consistent with differential IgG glycosylation linked to NK cell activation (Figure  
260 3), asialylated fuosylated glycoforms in RBD compared to non-antigen specific IgG were  
261 increased in those  $\geq 65$  years old (Figure 4I). These data showed that age negatively impacted  
262 some but not all Fc effector functions as it did for neutralization, which is likely due to the  
263 combination of decreased antibody levels and reduced antibody quality in differential  
264 glycosylation and altered FcR engagement.

265

#### 266 Polyclonal functional breadth and magnitude

267 Polyclonal antibody responses consist of multiple Fab and Fc domain features that interact to  
268 influence disease outcomes. To begin to assess the collective functionality for each vaccinee  
269 sample, we calculated the breadth of neutralization across all five SARS-CoV-2 isolates tested  
270 (Supplemental Figure 5A). In addition, we Z score transformed data from Fc assays to enable  
271 comparisons between effector functions and summarization of the cumulative Fc functional  
272 magnitude for each individual (Supplemental Figure 5B). To assess how Fc functionality related  
273 to Fab activity, we grouped individuals by their neutralization breadth. We found that neutralization  
274 of all variants (100%) was detectable in 28 of the 51 individuals, and those remaining  
275 demonstrated 50-83% breadth (Figure 5A). Of those with  $< 100\%$  neutralization breadth, the  
276 cumulative Fc functional scores were low or negative. Of those with 100% neutralization breadth,  
277 both positive and negative cumulative Fc functional scores were detected. Thus, high  
278 neutralization breadth and potent Fc effector functions are linked. Moreover, Fc functionality  
279 represented a source of immune variation in the presence of broad Fab mediated neutralization.

280

281 Because we observed that both neutralizing (Figure 1) and non-neutralizing (Figure 4) antibody  
282 functions were dependent on age, we assessed age with respect to neutralization breadth. We  
283 found that the median age for those with 100% neutralization was younger (39 years) compared  
284 to those with <100% (64.5, 67.5 and 52 years for 50%, 67% and 83% neutralization, respectively)  
285 (Figure 5A). Thus, both antibody Fab and Fc mediated breadth and potency diminished with age.  
286  
287 To focus on age categorically, we grouped individuals into those <65 and  $\geq 65$ . The cutoff of 65  
288 years was chosen for three reasons: 1) 63.5 is the median age of the subgroup of individuals with  
289 no detectable neutralization against Omicron (BA.2), the variant with the lowest overall activities  
290 (Figure 1B), 2) the median ages of the two groups with the lowest neutralization breadths are 64.5  
291 and 67.5 (Figure 5A) and 3)  $\geq 65$  is the definition of older adults used by the Center for Disease  
292 Control and Prevention with respect to COVID-19 vaccine administration guidelines (Bialek et al.,  
293 2020). We calculated the polyfunctional breadth for each vaccinee by enumerating the proportion  
294 of detectable SARS-CoV-2 neutralizing and non-neutralizing responses to categorize individuals  
295 as high, medium, and low responders (Supplemental Figure 5C). We observed that most  
296 individuals <65 had high polyfunctional breadth while those  $\geq 65$  had low or medium (Figure 5B).  
297 This difference in breadth was not noted with groupings by sex (Figure 5C). In addition to antibody  
298 breadth, we evaluated polyfunctional magnitude using vaccine specific neutralizing and non-  
299 neutralizing antibody Z score data. We found that the extent of all antibody functions except for  
300 ADCP was diminished in the  $\geq 65$  compared to <65 group (Figure 5D). Because polyfunctional  
301 antibody responses are comprised of multiple activities that potentially occur concurrently to  
302 influence outcomes of infection, we assessed the coordination between antibody features and  
303 functions in these two age groups. We found more coordination in those <65 compared to  $\geq 65$   
304 (Figure 5E). Thus, the breadth, magnitude, and coordination of BNT162b2 induced neutralizing  
305 and non-neutralizing antibody polyfunctionality diverge with respect to the age of 65 years.

## 306 Discussion

307 In this study we show that two doses of the BNT162b2 mRNA vaccine elicited coordinated  
308 neutralizing and non-neutralizing antibody functions. The presence of vaccine specific  
309 antibodies is critical but neutralizing and non-neutralizing antibody functions are driven by  
310 quality as well as quantity. Thus, titers correlated with neutralizing activity (Figure 1A) and  
311 vaccine induced neutralizing responses against live clinical isolates of SARS-CoV-2 and five  
312 distinct variants decreased with age (Figure 1B). Neutralization correlated with Fc $\gamma$ R111a/CD16a  
313 activation of natural killer cells that leads to cellular cytotoxicity but not phagocytosis or  
314 complement deposition (Figure 2). Engagement with Fc $\gamma$ R111a/CD16a was associated with post-  
315 translational vaccine specific IgG afucosylation and sialylation (Figure 3H-K) which diverge with  
316 age (Figure 4I). Antibody functions were diminished among those aged  $\geq 65$ : neutralization  
317 breadth across variants, overall Fc functional potency, and coordination between neutralizing  
318 and non-neutralizing antibody activities (Figure 5B, D, E), demonstrating compromised vaccine-  
319 induced polyfunctionality. Neutralizing activity and antibody titers are measured in vaccine  
320 studies to gauge effectiveness at blocking infection. The findings from this study show that non-  
321 neutralizing antibody effector functions are immune correlates that could inform on the potential  
322 of vaccines to prevent disease, a target which is of growing importance with the continual  
323 emergence of new variants that subvert neutralization.

324  
325 Non-neutralizing antibody functions are mediated by immune complexing and binding between  
326 the Fc domain and Fc receptors. Thus, even with reduced Fab domain avidity for mutated viral  
327 proteins such as spike, vaccine induced non-neutralizing Fc functions could remain robust. Our  
328 data show that neutralizing activities across all variants are lower compared to wildtype virus  
329 (Figure 1B), suggesting that effectiveness in preventing infection is significantly compromised.  
330 However, even with increased case numbers of infection due to variants, epidemiological data

331 show relatively strong vaccine protection against disease and hospitalization (Altarawneh et al.,  
332 2022; Andrews et al., 2022; Collie et al., 2022; Nasreen et al., 2022; Tang et al., 2021). Our  
333 data show that the correlation between titers and neutralizing activities was decreased across  
334 different variants, and the relationships with non-neutralizing functions, specifically ADNKA  
335 partially overlapped (Figure 5E).

336  
337 In line with these observations from human studies, data from animal models demonstrate that  
338 *in vitro* neutralization does not uniformly correlate with *in vivo* protection against disease  
339 (Schafer et al., 2021). Moreover, enhancement of non-neutralizing Fc effector functions delay  
340 viral spread synergistically with neutralizing activity in mice (Beaudoin-Bussieres et al., 2022). In  
341 humans, our results show that many non-neutralizing Fc effector functions were elicited by  
342 vaccination but antibody dependent NK cell activation that leads to cellular cytotoxicity  
343 specifically linked to neutralization across wildtype and SARS-CoV-2 variants (Figure 2). Thus,  
344 along with inhibiting viral entry by neutralization, vaccine specific antibodies via Fc $\gamma$ RIIIa/CD16a  
345 expressing NK cells, monocytes and macrophages could target cytotoxicity against airway  
346 epithelial cells already infected with SARS-CoV-2 to prevent viral spread and disease.

347  
348 In natural infection, Fc $\gamma$ RIIIa/CD16a is associated with disease severity (Chakraborty et al.,  
349 2021; Chakraborty et al., 2022; Hoepel et al., 2021; Junqueira et al., 2022; Larsen et al., 2021).  
350 While our data here do not include individuals with severe COVID-19 disease, the nature of  
351 polyclonal antibodies generated during natural infection diverge from vaccination. First, the  
352 antigenic repertoire after natural infection likely contains non-RBD specific antibody responses  
353 that are absent after vaccination. Second, antibody titers are likely diminished with exposure to  
354 lower amounts of antigen from mild and asymptomatic infection compared to severe disease  
355 and vaccination (Dufloo et al., 2021). Thus, Fc $\gamma$ RIIIa/CD16a activities from immunity generated

356 after natural infection could confer different downstream consequences compared to  
357 vaccination.

358  
359 Post-translational IgG glycosylation influences Fc receptor binding and activation. Along with  
360 afucosylation that enhances Fc $\gamma$ RIIIa/CD16a engagement which is also observed in severe  
361 COVID-19 disease, our data from whole vaccine specific IgG show that sialic acid could also  
362 contribute (Figure 3H and Figure 5). As such, sialylation on vaccine specific IgG could further  
363 modify Fc $\gamma$ RIIIa/CD16a activation. The study of IgG glycosylation has focused primarily on N297  
364 of the Fc domain (Chakraborty et al., 2021; Chakraborty et al., 2022; Farkash et al., 2021;  
365 Hoepel et al., 2021; Larsen et al., 2021), not accounting for the 20% of polyclonal IgG modified  
366 on the Fab domain (van de Bovenkamp et al., 2016). Our evaluation of whole IgG suggests that  
367 glycans from both Fab and Fc domains contribute to Fc effector functions by indirectly and  
368 directly affecting Fc receptor interactions (He et al., 2016; Shi et al., 2019; Yamaguchi et al.,  
369 2022). Thus, how an Fc receptor is activated by differential antibody glycosylation could be  
370 critical in determining the outcomes of downstream immune responses.

371  
372 The factors which predict vaccine response at an individual level are the subject of intense  
373 study. Several lines of evidence support that age is one important factor (Bates et al., 2021a;  
374 Collier et al., 2021; Farkash et al., 2021). Our study was designed to look specifically at the  
375 contribution of age to non-neutralizing antibody activities from vaccination. In the elderly  
376 compared to younger individuals, virus specific memory B cells and antibody titers persist longer  
377 than neutralizing activity (Jeffery-Smith et al., 2022). Thus, loss of neutralization with a shift  
378 towards more dependence on non-neutralizing antibody activity could be a hallmark of  
379 immunosenescence. As such, monitoring non-neutralizing in addition to neutralizing functions  
380 could help determine the need and dose of booster vaccinations for this population. Moreover,

381 approaches using adjuvants to enhance vaccine mediated non-neutralizing antibody functions  
382 such as Fc $\gamma$ R111a/CD16a could be beneficial (Coler et al., 2018).

383  
384 With respect to the broader population, analyses of longitudinal and cross-sectional studies  
385 involving vaccination and infection show that non-neutralizing functions including NK cell activity  
386 and ADCC are sustained longer than neutralization (Fuentes-Villalobos et al., 2022; Lee et al.,  
387 2021; Tso et al., 2021). Modeling of neutralization decay predicts that protection from infection  
388 is lost but protection from severe disease is retained (Khoury et al., 2021). This divergence  
389 between neutralizing titers and immune protection is likely due to multiple factors including viral  
390 fitness (Mlcochova et al., 2021; Wang et al., 2021; Weisblum et al., 2020), T cell activities  
391 (Keeton et al., 2022) as well as non-neutralizing responses such as the Fc $\gamma$ R111a/CD16a  
392 functions observed here. Thus, enhancing non-neutralizing activities elicited by vaccines could  
393 provide longer lasting protection against disease independent of altering vaccine antigens to  
394 target each new variant.

395  
396 Current CDC vaccine recommendations for healthy adults <50 involve three total doses and for  
397 those  $\geq$ 50, four. At the time of this writing, 91.8% of the US population  $\geq$ 65 who have received  
398 two doses, 70.4% three and 39.1% four (CDC, 2022). Outside the US, many parts of the world  
399 still have limited access to vaccine and have lower rates of vaccination. Our data support the  
400 assertion that for those elderly individuals with two doses of BNT162b2, immunity is suboptimal  
401 because neutralizing and non-neutralizing antibody activities are restricted. The effects of  
402 additional doses of vaccines using antigens from the original SARS-CoV-2 strain or Omicron  
403 and infection on top of vaccination that generates hybrid immunity remain to be fully defined but  
404 likely encompass enriched neutralization breadth and Fc potency (Collier et al., 2021; Farkash  
405 et al., 2021; Richardson et al., 2022). How much protection is enhanced is a subject of active



406 discourse (Atmar et al., 2022; Regev-Yochay et al., 2022). Evaluating the breadth, magnitude  
407 and coordination of polyclonal antibody functions (Figure 5) will enhance resolution of correlates  
408 of protection, particularly in the context of variants where the effect of neutralizing activity is  
409 likely limited. There is growing evidence that adjuvants and antigens can be used to skew  
410 immune responses including antibody glycosylation and Fc effector functions for rational  
411 vaccine design (Bartsch et al., 2020; Boudreau et al., 2020; Mahan et al., 2016; Oefner et al.,  
412 2012). Approaches that leverage the collaboration between antibody Fab and Fc domain  
413 functions could improve vaccine efficacy against variants for all, and specifically for vulnerable  
414 populations with difficulty generating neutralizing responses such as the elderly.

415

#### 416 Limitations of the study

417 Limitations to this study include sample size, the lack of ethnicity, race and clinical data and the  
418 homogeneity of the population examined with all participants being employees of a local health  
419 care system. These cohort characteristics limited the ability to resolve more subtle differences  
420 and extrapolate across a diverse array of individuals but also minimized potential sources of  
421 confounding variables, likely facilitating the discovery of relationships between antibody features  
422 that would otherwise be difficult to discern due to the complexity and heterogeneity of  
423 polyfunctional antibodies. The absence of infection was not determined by molecular  
424 microbiological diagnostics but rather serologically by the lack of detectable nucleocapsid  
425 (Supplemental Figure 1A), RBD specific antibodies prior to vaccination (Bates et al., 2021a) and  
426 clinical history. As such, it is plausible that individuals with asymptomatic infections are included.  
427 However, the dominant immune responses measured were likely due to vaccination given the  
428 narrow window between the second vaccine dose and sample collection time (14-15 days). As  
429 the cohort was sex balanced, the major known phenotypic variation in this group was age (21 to  
430 82 years).

431

432 **STAR Methods**

433 **RESOURCE AVAILABILITY**

434

435 ***Lead contact***

436 Further information and requests for resources and reagents should be directed to and will be  
437 fulfilled by the lead contact, Lenette Lu ([lenette.lu@utsouthwestern.edu](mailto:lenette.lu@utsouthwestern.edu)).

438

439 ***Materials availability***

440 No unique reagents were generated during the course of this study.

441

442 ***Data and code availability***

443 The dataset generated during this study is available upon reasonable request. This paper does  
444 not report original code. Any additional information required to reanalyze the data reported in  
445 this paper is available from the lead contact upon request.

446

447 **EXPERIMENTAL MODEL AND SUBJECT DETAILS**

448

449 **Cohort**

450 Study participants (n=51) were enrolled between December 2020 and February 2021 at Oregon  
451 Health & Science University immediately after receiving their first dose of BNT162b2 vaccine.  
452 Participants received a second vaccine dose between 21±1 days following the first dose, then  
453 returned 14-15 days later for follow up. Whole blood was collected in serum tubes (BD) and  
454 serum isolated by centrifugation 1000xg for 10min. Sera were heat inactivated at 65°C for  
455 30min then frozen at -20°C. This study was conducted in accordance with the Oregon Health &  
456 Science University Institutional Review Board with written informed consent from all participants,

457 and approved by the UT Southwestern Medical Center Institutional Review Board. Written  
458 informed consent was received from all study participants prior to participation.

459

#### 460 **Cell Lines**

461 Vero E6 cells were purchased from ATCC (ATCC VERO C1008), grown at 37C, 5% CO<sub>2</sub> and  
462 maintained in Dulbecco's Modified Eagle Medium supplemented with 10% fetal bovine serum,  
463 1% penicillin/streptomycin, 1% non-essential amino acids. THP-1 cells were purchased from  
464 ATCC (ATCC TIB-202), grown at 37C, 5% CO<sub>2</sub> and maintained in RPMI-1640 supplemented  
465 with 10% fetal bovine serum, 2mM L-glutamine, 10mM HEPES, and 0.05 mM β-  
466 mercaptoethanol. CD16.NK-92 (ATCC PTA-6967) were purchased from ATCC (ATCC PTA-  
467 6967), grown at 37C, 5% CO<sub>2</sub> and maintained in in MEM-α supplemented with 12.5% FBS,  
468 12.5% horse serum, 1.5g/L sodium bicarbonate, 0.02mM folic acid, 0.2mM inositol, 0.1 mM 2-β-  
469 mercaptoethanol, 100U/mL recombinant IL-2.

470

#### 471 **Primary Immune Cells**

472 Fresh peripheral blood was collected at UT Southwestern from healthy volunteers. All were over  
473 18 and de-identified prior to blood processing. Neutrophils isolated from peripheral blood were  
474 maintained at 37C, 5% CO<sub>2</sub> in RPMI with 10% fetal bovine serum, L-glutamine, and HEPES.  
475 The study was approved by the UT Southwestern Medical Center Institutional Review Board.  
476 Written informed consent was received from all study participants prior to participation.

477

#### 478 **METHOD DETAILS**

479

#### 480 **Virus**

481 SARS-CoV-2 clinical isolates were passaged once before use in neutralization assays: USA-  
482 WA1/2020 [original strain] (BEI Resources NR-52281); USA/CA\_CDC\_5574/2020 [B.1.1.7] (BEI

483 Resources NR-54011); hCoV-54 19/South Africa/KRISP-K005325/2020 [B.1.351] (BEI  
484 Resources NR-54009); hCoV-19/Japan/TY7-503/2021 [P.1] (BEI Resources NR-54982); hCoV-  
485 19/USA/PHC658/2021 [B.1.617.2] (BEI Resources NR-55611); and hCoV-19/USA/CO-CDPHE-  
486 2102544747/2021 [B.1.1.529 - BA.2] (BEI Resources NR-56520). Isolates were propagated in  
487 Vero E6 cells for 24 to 72hrs until cultures displayed at least 20% cytopathic effect (CPE), as  
488 previously described .

489

#### 490 **Enzyme Linked Immunosorbent Assays (ELISA)**

491 ELISAs were performed as described (Bates et al., 2021b). Plates were coated overnight at 4°C  
492 with 1 mg/mL recombinant SARS-CoV-2 spike receptor binding domain (RBD) protein (Bates et  
493 al., 2021c) (BEI Resources NR-52309) or recombinant SARS-CoV-2 nucleocapsid (N) protein  
494 (BEI Resources NR-53797). Serum dilutions (6 x 3-fold for RBD, 6 x 4-fold for N) in duplicate  
495 were prepared in 5% milk powder, 0.05% Tween-20, in phosphate buffered saline (PBS),  
496 starting at 1:1600 (pan-Ig), 1:50 (IgA), 1:200 (IgG). The secondary antibodies used were pan-Ig  
497 (1:10,000 anti-human GOXHU IgG/A/M-HRP, A18847 Invitrogen), IgA (1:3,000 anti-human IgA-  
498 HRP, 411002 Biolegend), and IgG (1:3,000 anti-human IgG-HRP 555788, BD Biosciences).  
499 Plates were developed with o-phenylenediamine (OPD) (ThermoScientific). Absorbance at  
500 492nm was measured on a CLARIOstar plate reader and normalized by subtracting the average  
501 of negative control wells and dividing by the highest concentration from a positive control  
502 dilution series. ELISA EC50 values were calculated by fitting normalized A492 as described  
503 (Bates et al., 2021b). The limit of detection (LOD) was defined by the lowest dilution tested for  
504 RBD and half of the lowest dilution for N. Values below the LOD were set to LOD – 1.

505

#### 506 **Focus Reduction Neutralization Test (FRNT)**

507 Focus forming assays were performed as described (Bates et al., 2021b). Sub-confluent Vero  
508 E6 cells were incubated for 1 hour with 30 µL of diluted sera (5 x 4-fold starting at 1:20) which

509 was pre-incubated for 1 hour with 100 infectious viral particles per well. Samples were tested in  
510 duplicate. Wells were covered with 150  $\mu$ L of overlay media containing 1% methylcellulose and  
511 incubated for 24hrs, 48hrs for Omicron. Plates were fixed by soaking in 4% formaldehyde in  
512 PBS for 1 hour at room temperature. After permeabilization with 0.1% BSA, 0.1% saponin in  
513 PBS, plates were incubated overnight at 4°C with primary antibody (1:5,000 anti-SARS-CoV-2  
514 alpaca serum, 1:2,000 for Omicron) (Capralogics Inc) (Bates et al., 2021b). Plates were then  
515 washed and incubated for 2hrs at room temperature with secondary antibody (1:20,000 anti-  
516 alpaca-HRP, 1:5,000 for Omicron) (NB7242 Novus) and developed with TrueBlue (SeraCare)  
517 for 30min. Foci were imaged with a CTL Immunospot Analyzer, enumerated using the viridot  
518 package (Katzelnick et al., 2018) and percent neutralization calculated relative to the average of  
519 virus-only wells for each plate. FRNT50 values were determined by fitting percent neutralization  
520 to a 3-parameter logistic model as described previously (Bates et al., 2021b). The limit of  
521 detection (LOD) was defined by the lowest dilution tested, values below the LOD were set to  
522 LOD – 1. Duplicate FRNT50 values were first calculated separately to confirm values were  
523 within 4-fold. When true, a final FRNT50 was calculated by fitting to combined replicates.

524

### 525 **Fc receptor binding assays**

526 Fc receptor binding assays were performed as described with modifications (Brown et al.,  
527 2017). Carboxylated microspheres (Luminex) were coupled with recombinant SARS-CoV-2  
528 RBD (Bates et al., 2021c)(BEI Resources NR-52309) by covalent NHS-ester linkages via EDC  
529 (1-Ethyl-3-[3-dimethylaminopropyl]carbodiimide hydrochloride, Thermo Scientific Pierce) and  
530 Sulfo-NHS (N-hydroxysulfosuccinimide) (Thermo Scientific) per the manufacturer's instructions.  
531 A mixture of influenza antigens from strain H1N1 (NR-20083 and NR-51702, BEI Resources),  
532 H5N1 (NR-12148, BEI Resources), H3N2, B Yamagata lineage, and B Victoria lineage (NR-  
533 51702, BEI Resources) was used as a control. A mixture of recombinant *Bacillus anthracis*  
534 antigens (Anthrax Protective Antigen, NR-36208 BEI Resources; Anthrax Lethal Factor, NR-

535 28544 BEI Resources; Anthrax Edema Factor, NR-36210 BEI Resources) and a separate  
536 mixture of recombinant Respiratory Syncytial Virus antigens (G protein from strain B1, NR-  
537 31098 BEI Resources; F protein from strain B1, NR-31097 BEI Resources; G protein from strain  
538 A2, NR-31096 BEI Resources) were also used as controls. Antigen-coupled microspheres  
539 (1250 beads per well) were incubated with serially diluted sera (1:100, 1:1000, 1:10000) in 96-  
540 well Bioplex Pro Flat Bottom plates (Bio-Rad) at 4°C for 16hrs. Recombinant Fc receptors  
541 (FcγRIIIa/CD16a, FcγRIIa/CD32a, FcγRIIb/CD32b, R&D Systems) were fluorescently labeled  
542 with PE (Abcam) before addition to bead bound antigen specific immune complexes. After 2hrs  
543 of incubation at room temperature, the beads were washed with PBS with 0.05% Tween20 and  
544 antigen specific antibody bound Fc receptor measured on a on a MAGPIX instrument containing  
545 xPONENT4.2 software (Luminex). The background signal, defined as MFI of microspheres  
546 incubated with PBS, was subtracted. Representative data from one dilution was chosen by the  
547 highest signal to noise ratio for further analyses.

548

#### 549 **Non-antigen and RBD-specific IgG glycosylation**

550 Non-antigen and RBD specific IgG glycans were purified and relative levels quantified as  
551 described with modifications (Mahan et al., 2015; Varadi et al., 2014). Recombinant RBD  
552 protein (BEI Resources NR-52309) (Bates et al., 2021c) was biotinylated with sulfosuccinimidyl-  
553 6-[biotinamido]-6-hexanamido hexanoate (sulfo-NHS-LC-LC biotin; ThermoScientific) and  
554 coupled to streptavidin beads (New England Biolabs). Patient sera were incubated with RBD-  
555 coupled beads and excess sera washed with PBS (Sigma). Bead-bound RBD-specific  
556 antibodies then eluted using 100mM citric acid (pH 3.0) and neutralized with 0.5M potassium  
557 phosphate (pH 9.0). Non-antigen specific or RBD-specific IgG were purified from the serum or  
558 eluted RBD-specific antibodies respectively by protein G beads (Millipore). Purified IgG was  
559 denatured and treated with PNGase enzyme (New England Biolabs) for 12hrs at 37°C to  
560 release glycans.

561

562 To isolate bulk IgG glycans, proteins were removed by precipitation using ice cold 100% ethanol  
563 at -20°C for 10min. To isolated RBD-specific IgG glycans, Agencourt CleanSEQ beads  
564 (Beckman Coulter) were used to bind glycans in 87.5% acetonitrile (Fisher Scientific). The  
565 supernatant was removed, glycans eluted from beads with HPLC grade water (Fisher Scientific)  
566 and dried by centrifugal force and vacuum (CentriVap). Glycans were fluorescently labeled with  
567 a 1.5:1 ratio of 50mM APTS (8-aminoinopyrene-1,3,6-trisulfonic acid, ThermoFisher) in 1.2M  
568 citric acid and 1M sodium cyanoborohydride in tetrahydrofuran (Fisher Scientific) at 55°C for  
569 3hrs. The labeled glycans were dissolved in HPLC grade water (Fisher Scientific) and excess  
570 unbound APTS was removed using Agencourt CleanSEQ beads and Bio-Gel P-2 (Bio-rad) size  
571 exclusion resin. Glycan samples were run with a LIZ 600 DNA ladder in Hi-Di formamide  
572 (ThermoFisher) on an ABI 3500xL DNA sequencer and analyzed with GlycanAssure Data  
573 Acquisition Software v.1.0. Each glycoform was separated by peaks and identified based on  
574 glycan standard libraries (GKSP-520, Agilent). The relative abundance of each glycan for each  
575 individual sample was determined as (area under curve of each glycan)/ (sum of area under  
576 curve of all individual glycans).

577

### 578 **Antibody dependent cellular phagocytosis (ADCP)**

579 The THP-1 (TIB-202, ATCC) phagocytosis assay of antigen-coated beads was conducted as  
580 described with modifications (Lu et al., 2016). SARS-CoV-2 RBD recombinant protein (BEI  
581 Resources NR-52309) (Bates et al., 2021c) was biotinylated with Sulfo-NHS-LC Biotin (Thermo  
582 Fisher), then incubated with 1 µm fluorescent neutravidin beads (Invitrogen) at 4°C for 16hrs.  
583 Excess antigen was washed away and RBD-coupled neutravidin beads were resuspended in  
584 PBS-0.1% bovine serum albumin (BSA). RBD-coupled beads were incubated with serial  
585 dilutions of sera (1:100, 1:500 and 1:2500) in duplicate for 2hrs at 37°C. THP1 cells ( $1 \times 10^5$  per  
586 well) were then added. Plasma opsonized RBD-coupled beads and THP1 cells were incubated

587 at 37°C for 16hrs. Cells were then washed once and fixed with 4% PFA. Bead uptake was  
588 measured on a BD LSRFortessa (SCC) equipped with high-throughput sampler and analyzed  
589 by FlowJo10. Phagocytic scores were calculated as the integrated median fluorescence  
590 intensity (MFI) (% bead-positive frequency × MFI/10,000) (Darrah et al., 2007). Representative  
591 data from one dilution was chosen by the highest signal to noise ratio for further analyses.

592

### 593 **Antibody dependent neutrophil phagocytosis (ADNP)**

594 The neutrophil phagocytosis assay of antigen-coated beads was conducted as described with  
595 modifications (Lu et al., 2016). Whole healthy donor blood was mixed with equal volume 3%  
596 dextran-500 (Thermo Fisher) and incubated for 25 min at room temperature to lyse and pellet  
597 the red blood cells. Leukocytes were removed and washed in endotoxin-free sterile water  
598 (Cytiva), followed by 1.8% NaCl (Thermo scientific) and then Hanks' balanced salt solution  
599 without calcium and magnesium (Thermo Fisher). RBD conjugated beads, as described above,  
600 were incubated with serial dilution of sera (1:100, 1:500 and 1:2500) for 2hrs at 37°C. Isolated  
601 neutrophils ( $1 \times 10^5$  per well) were added and incubated for 2hrs at 37°C. Bead uptake was  
602 measured on a BD LSRFortessa (SCC) equipped with high-throughput sampler and analyzed  
603 by FlowJo10. Phagocytic scores were calculated as the integrated median fluorescence  
604 intensity (MFI) (% bead-positive frequency × MFI/1,000). The purity of neutrophils was  
605 confirmed by staining with CD66b (BioLegend). Sera samples were tested in two independent  
606 experiments with neutrophils from two different HIV negative healthy donors. The mean of the  
607 data from both donors was used for further analysis. Representative data from one dilution was  
608 chosen by the highest signal to noise ratio for further analyses.

609

### 610 **Antibody dependent complement deposition (ADCD)**

611 The ADCD assay was performed as described with modifications (Fischinger et al., 2019).  
612 Carboxylated microspheres (Luminex) were coupled with SARS-CoV-2 RBD protein (Bates et



613 al., 2021c) (NR-52309 BEI Resources) by covalent NHS-ester linkages via EDC (1-Ethyl-3-[3-  
614 dimethylaminopropyl]carbodiimide hydrochloride, Thermo Scientific Pierce) and Sulfo-NHS (N-  
615 hydroxysulfosuccinimide, Thermo Scientific) per manufacturer instructions. A mixture of  
616 influenza antigens from strains H1N1 (NR-20083 and NR-51702, BEI Resources), H5N1 (NR-  
617 12148, BEI Resources), H3N2, B Yamagata lineage, and B Victoria lineage (NR-51702, BEI  
618 Resources) was used as a control. Serum samples were heated at 56°C for 30min. Antigen-  
619 coated microspheres (1250 per well) were added to a 96-well Bioplex Pro Flat Bottom plates  
620 (Bio-Rad) and incubated with serial dilutions of sera (1:10, 1:50 and 1:250) in duplicate at 4°C  
621 for 16hrs. Freshly resuspended lyophilized guinea pig complement (Cedarlane) diluted 1:60 was  
622 added to the plate for 20min at 37°C. After washing off excess complement three times  
623 with 15mM EDTA, anti-C3 PE-conjugated goat polyclonal IgG (MP Biomedicals) was added. The  
624 beads were then washed and C3 deposition quantified on a MAGPIX instrument containing  
625 xPONENT4.2 software (Luminex). The background signal, defined as MFI of microspheres  
626 incubated with PBS, was subtracted. Representative data from one dilution was chosen by the  
627 highest signal to noise ratio for further analyses.

628

#### 629 **Antibody dependent NK cell activation (ADNKA)**

630 ADNKA assay was performed as described with modifications (Gunn et al., 2020). ELISA plates  
631 were coated with recombinant RBD antigen (300 ng/well) (Bates et al., 2021c) (BEI Resources  
632 NR-52309). Wells were washed, blocked, and incubated with serial dilutions of sera (1:10, 1:30,  
633 1:90) in duplicate for 2hrs at 37°C prior to adding CD16a.NK-92 cells (PTA-6967, ATCC) ( $5 \times$   
634  $10^4$  cells/well) for 5hrs with brefeldin A (Biolegend), Golgi Stop (BD Biosciences) and anti-  
635 CD107a (clone H4A3, BD Biosciences). Cells were stained with anti-CD56 (clone 5.1H11, BD  
636 Biosciences) and anti-CD16 (clone 3G8, BD Biosciences) and fixed with 4% PFA. Intracellular  
637 cytokine staining to detect IFN $\gamma$  (clone B27, BD Biosciences) and TNF $\alpha$  (clone Mab11, BD  
638 Biosciences) was performed in permeabilization buffer (Biolegend). Markers were measured

639 using a BD LSRFortessa and analyzed by FlowJo10. CD16 expression was confirmed in all  
640 cells. NK cell degranulation and activation were calculated as percent of CD56+NK cells  
641 positive for CD107a, or IFN $\gamma$  or TNF $\alpha$  expression. Representative data from one dilution was  
642 chosen by the highest signal to noise ratio for further analyses.

643

## 644 **QUANTIFICATION AND STATISTICAL ANALYSIS**

645 Statistical analysis and graphing were performed using Stata17 and GraphPad Prism9.0. Data  
646 are summarized using the descriptive measures median, minimum, maximum and percent (%).  
647 Wilcoxon matched pair signed rank tests were used to compare neutralization of live SARS-  
648 CoV-2 variants (Figure 1B) and glycoforms between antigen non-specific and RBD specific IgG  
649 (Figures 3C-F, Supplemental Figure 3D-E). Mann-U-Whitney tests were used to compare the  
650 neutralization of live SARS-CoV-2 variants between male and female (Supplemental Figure 1C).  
651 Spearman rank correlations were used to examine bivariate associations between variables  
652 (Figure 2 and 5E, Supplemental Figure 1D and 2). Simple linear regression was used to  
653 examine the relationship between IgG glycoforms as the independent and Fc functional profiles  
654 as the dependent variables (Figure 3H-K and Supplemental Figure 4). Multiple robust  
655 regression models were used to adjust for the effect of age and sex when comparing the study  
656 variables between individuals (Figure 1A, C-H, Figure 4, and Supplemental Figure 5). Z scores  
657 of each individual Fc feature was calculated and then summed to generate the cumulative Fc  
658 functional magnitude (Figure 5A, Supplemental Figure 6B). For the radar plots (Figure 4I), Z  
659 scores of each individual RBD specific IgG glycoforms relative to bulk non-antigen specific IgG  
660 glycoforms were calculated and the median values for each age group were plotted. For the  
661 radar plots (Figure 5D), Z scores of each feature for each individual were calculated and the  
662 median values for each group were plotted. All p values are two-sided, and  $p < 0.05$  was  
663 considered significant. In figures, asterisks denote statistical significance (\*  $p \leq 0.05$ ; \*\*  $p \leq$   
664  $0.01$ ; \*\*\*  $p \leq 0.001$ ; \*\*\*\*  $p \leq 0.0001$ ) with comparisons specified by connecting lines.

665

666

## 667 **Acknowledgements**

668 This study was funded by a grant from the M. J. Murdock Charitable Trust (to MEC), an  
669 unrestricted grant from the OHSU Foundation (to MEC), the NIH training grant T32HL083808  
670 (to TAB), NIH grant R011R01AI141549-01A1 (to FGT), OHSU Innovative IDEA grant 1018784  
671 (to FGT), NIH grant R01AI145835 (to WBM), Burroughs Wellcome Fund UT Southwestern  
672 Training Resident Doctors as Innovators in Science (to YJK), pilot project grant from the UT  
673 Southwestern Department of Internal Medicine and Disease Oriented Scholars Award (to LLL).  
674 We gratefully acknowledge the OHSU workforce members who participated in this study; the  
675 OHSU COVID-19 serology study team and the OHSU occupational health department for their  
676 efforts in recruitment and sample acquisition; the OHSU clinical laboratory under the direction of  
677 Donna Hansel and Xuan Qin for SARS-Co-2 testing and reporting. We thank UTSW healthy  
678 volunteers who donated their blood for neutrophil studies; Dawn Wetzel for efforts in  
679 recruitment; Gabrielle Lessen for phlebotomy assistance; Ann McDonald for graphical  
680 assistance. We are grateful for the support of the M.J. Murdock Charitable Trust and the OHSU  
681 Foundation. The funders of the study had no role in study design, execution, analysis,  
682 interpretation, or writing of this manuscript.

683

## 684 **Author Contributions**

685 LLL and FGT conceived, designed and supervised the work. TAB and PL designed, conducted  
686 and analyzed experiments. MEC, WBM, DS, SKM coordinated sample and reagent collection.  
687 SKM acquired and analyzed data. YJK, MT, CP, and DK analyzed the data. LLL, FGT, TAB,  
688 and PL wrote the manuscript. YJK, MT, SKM, DK, WBM, MEC contributed to manuscript  
689 revisions.

690

691

692

## 693 **References**

- 694 Adeniji, O.S., Giron, L.B., Purwar, M., Zilberstein, N.F., Kulkarni, A.J., Shaikh, M.W., Balk, R.A.,  
695 Moy, J.N., Forsyth, C.B., Liu, Q., *et al.* (2021). COVID-19 Severity Is Associated with Differential  
696 Antibody Fc-Mediated Innate Immune Functions. *mBio* *12*.
- 697 Altarawneh, H.N., Chemaitelly, H., Ayoub, H.H., Tang, P., Hasan, M.R., Yassine, H.M., Al-Khatib,  
698 H.A., Smatti, M.K., Coyle, P., Al-Kanaani, Z., *et al.* (2022). Effects of Previous Infection and  
699 Vaccination on Symptomatic Omicron Infections. *N Engl J Med* *387*, 21-34.
- 700 Alter, G., Ottenhoff, T.H.M., and Joosten, S.A. (2018). Antibody glycosylation in inflammation,  
701 disease and vaccination. *Semin Immunol* *39*, 102-110.
- 702 Alter, G., Yu, J., Liu, J., Chandrashekar, A., Borducchi, E.N., Tostanoski, L.H., McMahan, K., Jacob-  
703 Dolan, C., Martinez, D.R., Chang, A., *et al.* (2021). Immunogenicity of Ad26.COV2.S vaccine  
704 against SARS-CoV-2 variants in humans. *Nature* *596*, 268-272.
- 705 Andrews, N., Tessier, E., Stowe, J., Gower, C., Kirsebom, F., Simmons, R., Gallagher, E., Thelwall,  
706 S., Groves, N., Dabrera, G., *et al.* (2022). Duration of Protection against Mild and Severe Disease  
707 by Covid-19 Vaccines. *N Engl J Med* *386*, 340-350.
- 708 Arnold, J.N., Wormald, M.R., Sim, R.B., Rudd, P.M., and Dwek, R.A. (2007). The impact of  
709 glycosylation on the biological function and structure of human immunoglobulins. *Annu Rev*  
710 *Immunol* *25*, 21-50.
- 711 Atmar, R.L., Lyke, K.E., Deming, M.E., Jackson, L.A., Branche, A.R., El Sahly, H.M., Rostad, C.A.,  
712 Martin, J.M., Johnston, C., Rupp, R.E., *et al.* (2022). Homologous and Heterologous Covid-19  
713 Booster Vaccinations. *N Engl J Med* *386*, 1046-1057.
- 714 Bartsch, Y.C., Eschweiler, S., Leliavski, A., Lunding, H.B., Wagt, S., Petry, J., Lilienthal, G.M.,  
715 Rahmoller, J., de Haan, N., Holscher, A., *et al.* (2020). IgG Fc sialylation is regulated during the  
716 germinal center reaction following immunization with different adjuvants. *J Allergy Clin*  
717 *Immunol* *146*, 652-666 e611.
- 718 Bartsch, Y.C., Wang, C., Zohar, T., Fischinger, S., Atyeo, C., Burke, J.S., Kang, J., Edlow, A.G.,  
719 Fasano, A., Baden, L.R., *et al.* (2021). Humoral signatures of protective and pathological SARS-  
720 CoV-2 infection in children. *Nat Med* *27*, 454-462.
- 721 Bates, T.A., Leier, H.C., Lyski, Z.L., Goodman, J.R., Curlin, M.E., Messer, W.B., and Tafesse, F.G.  
722 (2021a). Age-Dependent Neutralization of SARS-CoV-2 and P.1 Variant by Vaccine Immune  
723 Serum Samples. *JAMA*.
- 724 Bates, T.A., Leier, H.C., Lyski, Z.L., McBride, S.K., Coulter, F.J., Weinstein, J.B., Goodman, J.R., Lu,  
725 Z., Siegel, S.A.R., Sullivan, P., *et al.* (2021b). Neutralization of SARS-CoV-2 variants by  
726 convalescent and BNT162b2 vaccinated serum. *Nat Commun* *12*, 5135.
- 727 Bates, T.A., Weinstein, J.B., Farley, S., Leier, H.C., Messer, W.B., and Tafesse, F.G. (2021c). Cross-  
728 reactivity of SARS-CoV structural protein antibodies against SARS-CoV-2. *Cell Rep* *34*, 108737.
- 729 Beaudoin-Bussieres, G., Chen, Y., Ullah, I., Prevost, J., Tolbert, W.D., Symmes, K., Ding, S.,  
730 Benlarbi, M., Gong, S.Y., Tazuin, A., *et al.* (2022). A Fc-enhanced NTD-binding non-neutralizing  
731 antibody delays virus spread and synergizes with a nAb to protect mice from lethal SARS-CoV-2  
732 infection. *Cell Rep* *38*, 110368.

733 Begin, P., Callum, J., Jamula, E., Cook, R., Heddle, N.M., Tinmouth, A., Zeller, M.P., Beaudoin-  
734 Bussieres, G., Amorim, L., Bazin, R., *et al.* (2021). Convalescent plasma for hospitalized patients  
735 with COVID-19: an open-label, randomized controlled trial. *Nat Med* 27, 2012-2024.

736 Bialek, S., Boundy, E., Bowen, V., Chow, N., Cohn, A., Dowling, N., Ellington, S., Gierke, R., Hall,  
737 A., MacNeil, J., *et al.* (2020). Severe Outcomes Among Patients with Coronavirus Disease 2019  
738 (COVID-19) — United States, February 12–March 16, 2020. *Morbidity and Mortality Weekly*  
739 *Report (MMWR)* 69, 343-346.

740 Boudreau, C.M., Yu, W.H., Suscovich, T.J., Talbot, H.K., Edwards, K.M., and Alter, G. (2020).  
741 Selective induction of antibody effector functional responses using MF59-adjuvanted  
742 vaccination. *J Clin Invest* 130, 662-672.

743 Brewer, R.C., Ramadoss, N.S., Lahey, L.J., Jahanbani, S., Robinson, W.H., and Lanz, T.V. (2022).  
744 BNT162b2 vaccine induces divergent B cell responses to SARS-CoV-2 S1 and S2. *Nat Immunol*  
745 23, 33-39.

746 Brown, E.P., Dowell, K.G., Boesch, A.W., Normandin, E., Mahan, A.E., Chu, T., Barouch, D.H.,  
747 Bailey-Kellogg, C., Alter, G., and Ackerman, M.E. (2017). Multiplexed Fc array for evaluation of  
748 antigen-specific antibody effector profiles. *J Immunol Methods* 443, 33-44.

749 CDC (2022). COVID-19 Vaccinations in the United States. In COVID Data Tracker (Atlanta, GA: US  
750 Department of Health and Human Services, CDC: Center for Disease Control and Prevention).

751 Chakraborty, S., Gonzalez, J., Edwards, K., Mallajosyula, V., Buzzanco, A.S., Sherwood, R.,  
752 Buffone, C., Kathale, N., Providenza, S., Xie, M.M., *et al.* (2021). Proinflammatory IgG Fc  
753 structures in patients with severe COVID-19. *Nat Immunol* 22, 67-73.

754 Chakraborty, S., Gonzalez, J.C., Sievers, B.L., Mallajosyula, V., Chakraborty, S., Dubey, M.,  
755 Ashraf, U., Cheng, B.Y., Kathale, N., Tran, K.Q.T., *et al.* (2022). Early non-neutralizing,  
756 afucosylated antibody responses are associated with COVID-19 severity. *Sci Transl Med* 14,  
757 eabm7853.

758 Chung, A.W., Kumar, M.P., Arnold, K.B., Yu, W.H., Schoen, M.K., Dunphy, L.J., Suscovich, T.J.,  
759 Frahm, N., Linde, C., Mahan, A.E., *et al.* (2015). Dissecting Polyclonal Vaccine-Induced Humoral  
760 Immunity against HIV Using Systems Serology. *Cell* 163, 988-998.

761 Coler, R.N., Day, T.A., Ellis, R., Piazza, F.M., Beckmann, A.M., Vergara, J., Rolf, T., Lu, L., Alter, G.,  
762 Hokey, D., *et al.* (2018). The TLR-4 agonist adjuvant, GLA-SE, improves magnitude and quality of  
763 immune responses elicited by the ID93 tuberculosis vaccine: first-in-human trial. *NPJ Vaccines*  
764 3, 34.

765 Collie, S., Champion, J., Moultrie, H., Bekker, L.G., and Gray, G. (2022). Effectiveness of  
766 BNT162b2 Vaccine against Omicron Variant in South Africa. *N Engl J Med* 386, 494-496.

767 Collier, D.A., Ferreira, I., Kotagiri, P., Datir, R.P., Lim, E.Y., Touizer, E., Meng, B., Abdullahi, A.,  
768 Collaboration, C.-N.B.C.-., Elmer, A., *et al.* (2021). Age-related immune response heterogeneity  
769 to SARS-CoV-2 vaccine BNT162b2. *Nature* 596, 417-422.

770 Darrah, P.A., Patel, D.T., De Luca, P.M., Lindsay, R.W., Davey, D.F., Flynn, B.J., Hoff, S.T.,  
771 Andersen, P., Reed, S.G., Morris, S.L., *et al.* (2007). Multifunctional TH1 cells define a correlate  
772 of vaccine-mediated protection against *Leishmania major*. *Nat Med* 13, 843-850.

773 Dufloo, J., Grzelak, L., Staropoli, I., Madec, Y., Tondeur, L., Anna, F., Pelleau, S., Wiedemann, A.,  
774 Planchais, C., Buchrieser, J., *et al.* (2021). Asymptomatic and symptomatic SARS-CoV-2  
775 infections elicit polyfunctional antibodies. *Cell Rep Med* 2, 100275.

776 Evans, J.P., Zeng, C., Qu, P., Faraone, J., Zheng, Y.M., Carlin, C., Bednash, J.S., Zhou, T., Lozanski,  
777 G., Mallampalli, R., *et al.* (2022). Neutralization of SARS-CoV-2 Omicron sub-lineages BA.1,  
778 BA.1.1, and BA.2. *Cell Host Microbe*.

779 Farkash, I., Feferman, T., Cohen-Saban, N., Avraham, Y., Morgenstern, D., Mayuni, G., Barth, N.,  
780 Lustig, Y., Miller, L., Shouval, D.S., *et al.* (2021). Anti-SARS-CoV-2 antibodies elicited by COVID-  
781 19 mRNA vaccine exhibit a unique glycosylation pattern. *Cell Rep* 37, 110114.

782 Fischinger, S., Fallon, J.K., Michell, A.R., Broge, T., Suscovich, T.J., Streeck, H., and Alter, G.  
783 (2019). A high-throughput, bead-based, antigen-specific assay to assess the ability of antibodies  
784 to induce complement activation. *J Immunol Methods* 473, 112630.

785 Fuentes-Villalobos, F., Garrido, J.L., Medina, M.A., Zambrano, N., Ross, N., Bravo, F., Gaete-  
786 Argel, A., Oyarzun-Arrau, A., Amanat, F., Soto-Rifo, R., *et al.* (2022). Sustained Antibody-  
787 Dependent NK Cell Functions in Mild COVID-19 Outpatients During Convalescence. *Front*  
788 *Immunol* 13, 796481.

789 Garcia-Beltran, W.F., Lam, E.C., Astudillo, M.G., Yang, D., Miller, T.E., Feldman, J., Hauser, B.M.,  
790 Caradonna, T.M., Clayton, K.L., Nitido, A.D., *et al.* (2021). COVID-19-neutralizing antibodies  
791 predict disease severity and survival. *Cell* 184, 476-488 e411.

792 Garcia-Beltran, W.F., St Denis, K.J., Hoelzemer, A., Lam, E.C., Nitido, A.D., Sheehan, M.L.,  
793 Berrios, C., Ofoman, O., Chang, C.C., Hauser, B.M., *et al.* (2022). mRNA-based COVID-19 vaccine  
794 boosters induce neutralizing immunity against SARS-CoV-2 Omicron variant. *Cell* 185, 457-466  
795 e454.

796 Gorman, M.J., Patel, N., Guebre-Xabier, M., Zhu, A.L., Atyeo, C., Pullen, K.M., Loos, C., Goez-  
797 Gazi, Y., Carrion, R., Jr., Tian, J.H., *et al.* (2021). Fab and Fc contribute to maximal protection  
798 against SARS-CoV-2 following NVX-CoV2373 subunit vaccine with Matrix-M vaccination. *Cell*  
799 *Rep Med* 2, 100405.

800 Group, R.C. (2021). Convalescent plasma in patients admitted to hospital with COVID-19  
801 (RECOVERY): a randomised controlled, open-label, platform trial. *Lancet* 397, 2049-2059.

802 Gunn, B.M., Roy, V., Karim, M.M., Hartnett, J.N., Suscovich, T.J., Goba, A., Momoh, M., Sandi,  
803 J.D., Kanneh, L., Andersen, K.G., *et al.* (2020). Survivors of Ebola Virus Disease Develop  
804 Polyfunctional Antibody Responses. *J Infect Dis* 221, 156-161.

805 He, W., Tan, G.S., Mullarkey, C.E., Lee, A.J., Lam, M.M., Krammer, F., Henry, C., Wilson, P.C.,  
806 Ashkar, A.A., Palese, P., *et al.* (2016). Epitope specificity plays a critical role in regulating  
807 antibody-dependent cell-mediated cytotoxicity against influenza A virus. *Proc Natl Acad Sci U S*  
808 *A* 113, 11931-11936.

809 Herman, J.D., Wang, C., Loos, C., Yoon, H., Rivera, J., Eugenia Dieterle, M., Haslwanter, D.,  
810 Jangra, R.K., Bortz, R.H., 3rd, Bar, K.J., *et al.* (2021). Functional convalescent plasma antibodies  
811 and pre-infusion titers shape the early severe COVID-19 immune response. *Nat Commun* 12,  
812 6853.

813 Hoepel, W., Chen, H.J., Geyer, C.E., Allahverdiyeva, S., Manz, X.D., de Taeye, S.W., Aman, J.,  
814 Mes, L., Steenhuis, M., Griffith, G.R., *et al.* (2021). High titers and low fucosylation of early  
815 human anti-SARS-CoV-2 IgG promote inflammation by alveolar macrophages. *Sci Transl Med*  
816 13.

817 Jeffery-Smith, A., Burton, A.R., Lens, S., Rees-Spear, C., Davies, J., Patel, M., Gopal, R., Muir, L.,  
818 Aiano, F., Doores, K.J., *et al.* (2022). SARS-CoV-2-specific memory B cells can persist in the  
819 elderly who have lost detectable neutralizing antibodies. *J Clin Invest* 132.

820 Junqueira, C., Crespo, A., Ranjbar, S., de Lacerda, L.B., Lewandrowski, M., Ingber, J., Parry, B.,  
821 Ravid, S., Clark, S., Schimpf, M.R., *et al.* (2022). Fcγ-mediated SARS-CoV-2 infection of  
822 monocytes activates inflammation. *Nature*.

823 Kaplonek, P., Cizmeci, D., Fischinger, S., Collier, A.R., Suscovich, T., Linde, C., Broge, T., Mann, C.,  
824 Amanat, F., Dayal, D., *et al.* (2022). mRNA-1273 and BNT162b2 COVID-19 vaccines elicit  
825 antibodies with differences in Fc-mediated effector functions. *Sci Transl Med*, eabm2311.

826 Katzelnick, L.C., Coello Escoto, A., McElvany, B.D., Chavez, C., Salje, H., Luo, W., Rodriguez-  
827 Barraquer, I., Jarman, R., Durbin, A.P., Diehl, S.A., *et al.* (2018). Viridot: An automated virus  
828 plaque (immunofocus) counter for the measurement of serological neutralizing responses with  
829 application to dengue virus. *PLoS Negl Trop Dis* 12, e0006862.

830 Kawasuji, H., Morinaga, Y., Tani, H., Saga, Y., Kaneda, M., Murai, Y., Ueno, A., Miyajima, Y.,  
831 Fukui, Y., Nagaoka, K., *et al.* (2021). Age-Dependent Reduction in Neutralization against Alpha  
832 and Beta Variants of BNT162b2 SARS-CoV-2 Vaccine-Induced Immunity. *Microbiol Spectr* 9,  
833 e0056121.

834 Keeton, R., Tincho, M.B., Ngomti, A., Baguma, R., Benede, N., Suzuki, A., Khan, K., Cele, S.,  
835 Bernstein, M., Karim, F., *et al.* (2022). T cell responses to SARS-CoV-2 spike cross-recognize  
836 Omicron. *Nature* 603, 488-492.

837 Khoury, D.S., Cromer, D., Reynaldi, A., Schlub, T.E., Wheatley, A.K., Juno, J.A., Subbarao, K.,  
838 Kent, S.J., Triccas, J.A., and Davenport, M.P. (2021). Neutralizing antibody levels are highly  
839 predictive of immune protection from symptomatic SARS-CoV-2 infection. *Nat Med* 27, 1205-  
840 1211.

841 Klingler, J., Lambert, G.S., Itri, V., Liu, S., Bandres, J.C., Enyindah-Asonye, G., Liu, X., Simon, V.,  
842 Gleason, C.R., Kleiner, G., *et al.* (2021). Detection of Antibody Responses against SARS-CoV-2 in  
843 Plasma and Saliva from Vaccinated and Infected Individuals. *medRxiv*.

844 Kurhade, C., Zou, J., Xia, H., Cai, H., Yang, Q., Cutler, M., Cooper, D., Muik, A., Jansen, K.U., Xie,  
845 X., *et al.* (2022). Neutralization of Omicron BA.1, BA.2, and BA.3 SARS-CoV-2 by 3 doses of  
846 BNT162b2 vaccine. *Nat Commun* 13, 3602.

847 Larsen, M.D., de Graaf, E.L., Sonneveld, M.E., Plomp, H.R., Nouta, J., Hoepel, W., Chen, H.J.,  
848 Linty, F., Visser, R., Brinkhaus, M., *et al.* (2021). Afucosylated IgG characterizes enveloped viral  
849 responses and correlates with COVID-19 severity. *Science* 371.

850 Lee, W.S., Selva, K.J., Davis, S.K., Wines, B.D., Reynaldi, A., Esterbauer, R., Kelly, H.G., Haycroft,  
851 E.R., Tan, H.X., Juno, J.A., *et al.* (2021). Decay of Fc-dependent antibody functions after mild to  
852 moderate COVID-19. *Cell Rep Med* 2, 100296.

853 Liu, J., Liu, Y., Xia, H., Zou, J., Weaver, S.C., Swanson, K.A., Cai, H., Cutler, M., Cooper, D., Muik,  
854 A., *et al.* (2021). BNT162b2-elicited neutralization of B.1.617 and other SARS-CoV-2 variants.  
855 *Nature* 596, 273-275.

856 Lofano, G., Gorman, M.J., Yousif, A.S., Yu, W.H., Fox, J.M., Dugast, A.S., Ackerman, M.E.,  
857 Suscovich, T.J., Weiner, J., Barouch, D., *et al.* (2018). Antigen-specific antibody Fc glycosylation  
858 enhances humoral immunity via the recruitment of complement. *Sci Immunol* 3.

859 Lu, L.L., Chung, A.W., Rosebrock, T.R., Ghebremichael, M., Yu, W.H., Grace, P.S., Schoen, M.K.,  
860 Tafesse, F., Martin, C., Leung, V., *et al.* (2016). A Functional Role for Antibodies in Tuberculosis.  
861 *Cell* 167, 433-443 e414.

862 Lu, L.L., Suscovich, T.J., Fortune, S.M., and Alter, G. (2018). Beyond binding: antibody effector  
863 functions in infectious diseases. *Nat Rev Immunol* 18, 46-61.

864 Lucas, C., Klein, J., Sundaram, M.E., Liu, F., Wong, P., Silva, J., Mao, T., Oh, J.E., Mohanty, S.,  
865 Huang, J., *et al.* (2021). Delayed production of neutralizing antibodies correlates with fatal  
866 COVID-19. *Nat Med* 27, 1178-1186.

867 Lustig, Y., Sapir, E., Regev-Yochay, G., Cohen, C., Fluss, R., Olmer, L., Indenbaum, V.,  
868 Mandelboim, M., Doolman, R., Amit, S., *et al.* (2021). BNT162b2 COVID-19 vaccine and  
869 correlates of humoral immune responses and dynamics: a prospective, single-centre,  
870 longitudinal cohort study in health-care workers. *Lancet Respir Med* 9, 999-1009.

871 Mahan, A.E., Jennewein, M.F., Suscovich, T., Dionne, K., Tedesco, J., Chung, A.W., Streeck, H.,  
872 Pau, M., Schuitemaker, H., Francis, D., *et al.* (2016). Antigen-Specific Antibody Glycosylation Is  
873 Regulated via Vaccination. *PLoS Pathog* 12, e1005456.

874 Mahan, A.E., Tedesco, J., Dionne, K., Baruah, K., Cheng, H.D., De Jager, P.L., Barouch, D.H.,  
875 Suscovich, T., Ackerman, M., Crispin, M., *et al.* (2015). A method for high-throughput, sensitive  
876 analysis of IgG Fc and Fab glycosylation by capillary electrophoresis. *J Immunol Methods* 417,  
877 34-44.

878 Mlcochova, P., Kemp, S.A., Dhar, M.S., Papa, G., Meng, B., Ferreira, I., Datir, R., Collier, D.A.,  
879 Albecka, A., Singh, S., *et al.* (2021). SARS-CoV-2 B.1.617.2 Delta variant replication and immune  
880 evasion. *Nature* 599, 114-119.

881 Nasreen, S., Chung, H., He, S., Brown, K.A., Gubbay, J.B., Buchan, S.A., Fell, D.B., Austin, P.C.,  
882 Schwartz, K.L., Sundaram, M.E., *et al.* (2022). Effectiveness of COVID-19 vaccines against  
883 symptomatic SARS-CoV-2 infection and severe outcomes with variants of concern in Ontario.  
884 *Nat Microbiol* 7, 379-385.

885 Nimmerjahn, F., and Ravetch, J.V. (2005). Divergent immunoglobulin g subclass activity through  
886 selective Fc receptor binding. *Science* 310, 1510-1512.

887 Noori, M., Nejadghaderi, S.A., Arshi, S., Carson-Chahhoud, K., Ansarin, K., Kolahi, A.A., and  
888 Safiri, S. (2022). Potency of BNT162b2 and mRNA-1273 vaccine-induced neutralizing antibodies  
889 against severe acute respiratory syndrome-CoV-2 variants of concern: A systematic review of in  
890 vitro studies. *Rev Med Virol* 32, e2277.

891 Oefner, C.M., Winkler, A., Hess, C., Lorenz, A.K., Holecska, V., Huxdorf, M., Schommartz, T.,  
892 Petzold, D., Bitterling, J., Schoen, A.L., *et al.* (2012). Tolerance induction with T cell-dependent  
893 protein antigens induces regulatory sialylated IgGs. *J Allergy Clin Immunol* 129, 1647-1655  
894 e1613.

895 Peschke, B., Keller, C.W., Weber, P., Quast, I., and Lunemann, J.D. (2017). Fc-Galactosylation of  
896 Human Immunoglobulin Gamma Isotypes Improves C1q Binding and Enhances Complement-  
897 Dependent Cytotoxicity. *Front Immunol* 8, 646.

898 Petrovic, T., Alves, I., Bugada, D., Pascual, J., Vuckovic, F., Skelin, A., Gaifem, J., Villar-Garcia, J.,  
899 Vicente, M.M., Fernandes, A., *et al.* (2021). Composition of the immunoglobulin G glycome  
900 associates with the severity of COVID-19. *Glycobiology* 31, 372-377.

901 Pincetic, A., Bournazos, S., DiLillo, D.J., Maamary, J., Wang, T.T., Dahan, R., Fiebiger, B.M., and  
902 Ravetch, J.V. (2014). Type I and type II Fc receptors regulate innate and adaptive immunity. *Nat*  
903 *Immunol* 15, 707-716.

904 Planas, D., Saunders, N., Maes, P., Guivel-Benhassine, F., Planchais, C., Buchrieser, J., Bolland,  
905 W.H., Porrot, F., Staropoli, I., Lemoine, F., *et al.* (2022). Considerable escape of SARS-CoV-2  
906 Omicron to antibody neutralization. *Nature* 602, 671-675.



907 Quast, I., Keller, C.W., Maurer, M.A., Giddens, J.P., Tackenberg, B., Wang, L.X., Munz, C.,  
908 Nimmerjahn, F., Dalakas, M.C., and Lunemann, J.D. (2015). Sialylation of IgG Fc domain impairs  
909 complement-dependent cytotoxicity. *J Clin Invest* *125*, 4160-4170.

910 Regev-Yochay, G., Gonen, T., Gilboa, M., Mandelboim, M., Indenbaum, V., Amit, S., Meltzer, L.,  
911 Asraf, K., Cohen, C., Fluss, R., *et al.* (2022). Efficacy of a Fourth Dose of Covid-19 mRNA Vaccine  
912 against Omicron. *N Engl J Med*.

913 Richardson, S.I., Manamela, N.P., Motsoeneng, B.M., Kaldine, H., Ayres, F., Makhado, Z.,  
914 Mennen, M., Skelem, S., Williams, N., Sullivan, N.J., *et al.* (2022). SARS-CoV-2 Beta and Delta  
915 variants trigger Fc effector function with increased cross-reactivity. *Cell Rep Med* *3*, 100510.

916 Savage, H.R., Santos, V.S., Edwards, T., Giorgi, E., Krishna, S., Planche, T.D., Staines, H.M.,  
917 Fitchett, J.R.A., Kirwan, D.E., Cubas Atienzar, A.I., *et al.* (2021). Prevalence of neutralising  
918 antibodies against SARS-CoV-2 in acute infection and convalescence: A systematic review and  
919 meta-analysis. *PLoS Negl Trop Dis* *15*, e0009551.

920 Schafer, A., Muecksch, F., Lorenzi, J.C.C., Leist, S.R., Cipolla, M., Bournazos, S., Schmidt, F.,  
921 Maison, R.M., Gazumyan, A., Martinez, D.R., *et al.* (2021). Antibody potency, effector function,  
922 and combinations in protection and therapy for SARS-CoV-2 infection in vivo. *J Exp Med* *218*.

923 Scully, E.P., Haverfield, J., Ursin, R.L., Tannenbaum, C., and Klein, S.L. (2020). Considering how  
924 biological sex impacts immune responses and COVID-19 outcomes. *Nat Rev Immunol* *20*, 442-  
925 447.

926 Selva, K.J., van de Sandt, C.E., Lemke, M.M., Lee, C.Y., Shoffner, S.K., Chua, B.Y., Davis, S.K.,  
927 Nguyen, T.H.O., Rowntree, L.C., Hensen, L., *et al.* (2021). Systems serology detects functionally  
928 distinct coronavirus antibody features in children and elderly. *Nat Commun* *12*, 2037.

929 Shi, L., Liu, T., Gross, M.L., and Huang, Y. (2019). Recognition of Human IgG1 by Fcγ3 Receptors:  
930 Structural Insights from Hydrogen-Deuterium Exchange and Fast Photochemical  
931 Oxidation of Proteins Coupled with Mass Spectrometry. *Biochemistry* *58*, 1074-1080.

932 Suryadevara, N., Shrihari, S., Gilchuk, P., VanBlargan, L.A., Binshtein, E., Zost, S.J., Nargi, R.S.,  
933 Sutton, R.E., Winkler, E.S., Chen, E.C., *et al.* (2021). Neutralizing and protective human  
934 monoclonal antibodies recognizing the N-terminal domain of the SARS-CoV-2 spike protein. *Cell*  
935 *184*, 2316-2331 e2315.

936 Syed, A.M., Taha, T.Y., Tabata, T., Chen, I.P., Ciling, A., Khalid, M.M., Sreekumar, B., Chen, P.Y.,  
937 Hayashi, J.M., Soczek, K.M., *et al.* (2021). Rapid assessment of SARS-CoV-2-evolved variants  
938 using virus-like particles. *Science* *374*, 1626-1632.

939 Tang, P., Hasan, M.R., Chemaitelly, H., Yassine, H.M., Benslimane, F.M., Al Khatib, H.A.,  
940 AlMukdad, S., Coyle, P., Ayoub, H.H., Al Kanaani, Z., *et al.* (2021). BNT162b2 and mRNA-1273  
941 COVID-19 vaccine effectiveness against the SARS-CoV-2 Delta variant in Qatar. *Nat Med* *27*,  
942 2136-2143.

943 Tso, F.Y., Lidenge, S.J., Poppe, L.K., Pena, P.B., Privatt, S.R., Bennett, S.J., Ngowi, J.R.,  
944 Mwaiselage, J., Belshan, M., Siedlik, J.A., *et al.* (2021). Presence of antibody-dependent cellular  
945 cytotoxicity (ADCC) against SARS-CoV-2 in COVID-19 plasma. *PLoS One* *16*, e0247640.

946 Ullah, I., Prevost, J., Ladinsky, M.S., Stone, H., Lu, M., Anand, S.P., Beaudoin-Bussieres, G.,  
947 Symmes, K., Benlarbi, M., Ding, S., *et al.* (2021). Live imaging of SARS-CoV-2 infection in mice  
948 reveals that neutralizing antibodies require Fc function for optimal efficacy. *Immunity* *54*, 2143-  
949 2158 e2115.

950 van de Bovenkamp, F.S., Hafkenscheid, L., Rispens, T., and Rombouts, Y. (2016). The Emerging  
951 Importance of IgG Fab Glycosylation in Immunity. *J Immunol* *196*, 1435-1441.

952 van Osch, T.L.J., Nouta, J., Derksen, N.I.L., van Mierlo, G., van der Schoot, C.E., Wuhrer, M.,  
953 Rispens, T., and Vidarsson, G. (2021). Fc Galactosylation Promotes Hexamerization of Human  
954 IgG1, Leading to Enhanced Classical Complement Activation. *J Immunol* *207*, 1545-1554.

955 Varadi, C., Lew, C., and Guttman, A. (2014). Rapid magnetic bead based sample preparation for  
956 automated and high throughput N-glycan analysis of therapeutic antibodies. *Anal Chem* *86*,  
957 5682-5687.

958 Vicente, M.M., Alves, I., Gaifem, J., Rodrigues, C.S., Fernandes, A., Dias, A.M., Stambuk, J.,  
959 Petrovic, T., Oliveira, P., Ferreira-da-Silva, F., *et al.* (2022). Altered IgG glycosylation at COVID-19  
960 diagnosis predicts disease severity. *Eur J Immunol*.

961 Vogel, A.B., Kanevsky, I., Che, Y., Swanson, K.A., Muik, A., Vormehr, M., Kranz, L.M., Walzer,  
962 K.C., Hein, S., Guler, A., *et al.* (2021). BNT162b vaccines protect rhesus macaques from SARS-  
963 CoV-2. *Nature* *592*, 283-289.

964 Wang, P., Nair, M.S., Liu, L., Iketani, S., Luo, Y., Guo, Y., Wang, M., Yu, J., Zhang, B., Kwong, P.D.,  
965 *et al.* (2021). Antibody resistance of SARS-CoV-2 variants B.1.351 and B.1.1.7. *Nature* *593*, 130-  
966 135.

967 Wang, Q., Guo, Y., Iketani, S., Nair, M.S., Li, Z., Mohri, H., Wang, M., Yu, J., Bowen, A.D., Chang,  
968 J.Y., *et al.* (2022). Antibody evasion by SARS-CoV-2 Omicron subvariants BA.2.12.1, BA.4 and  
969 BA.5. *Nature*.

970 Weisblum, Y., Schmidt, F., Zhang, F., DaSilva, J., Poston, D., Lorenzi, J.C., Muecksch, F.,  
971 Rutkowska, M., Hoffmann, H.H., Michailidis, E., *et al.* (2020). Escape from neutralizing  
972 antibodies by SARS-CoV-2 spike protein variants. *Elife* *9*.

973 Winkler, E.S., Gilchuk, P., Yu, J., Bailey, A.L., Chen, R.E., Chong, Z., Zost, S.J., Jang, H., Huang, Y.,  
974 Allen, J.D., *et al.* (2021). Human neutralizing antibodies against SARS-CoV-2 require intact Fc  
975 effector functions for optimal therapeutic protection. *Cell* *184*, 1804-1820 e1816.

976 Writing Committee for the, R.-C.A.P.I., Estcourt, L.J., Turgeon, A.F., McQuilten, Z.K., McVerry,  
977 B.J., Al-Beidh, F., Annane, D., Arabi, Y.M., Arnold, D.M., Beane, A., *et al.* (2021). Effect of  
978 Convalescent Plasma on Organ Support-Free Days in Critically Ill Patients With COVID-19: A  
979 Randomized Clinical Trial. *JAMA* *326*, 1690-1702.

980 Yamaguchi, Y., Wakaizumi, N., Irisa, M., Maruno, T., Shimada, M., Shintani, K., Nishiumi, H.,  
981 Yogo, R., Yanaka, S., Higo, D., *et al.* (2022). The Fab portion of immunoglobulin G has sites in the  
982 CL domain that interact with Fc gamma receptor IIIa. *MAbs* *14*, 2038531.

983 Yamin, R., Jones, A.T., Hoffmann, H.H., Schafer, A., Kao, K.S., Francis, R.L., Sheahan, T.P., Baric,  
984 R.S., Rice, C.M., Ravetch, J.V., *et al.* (2021). Fc-engineered antibody therapeutics with improved  
985 anti-SARS-CoV-2 efficacy. *Nature* *599*, 465-470.

986

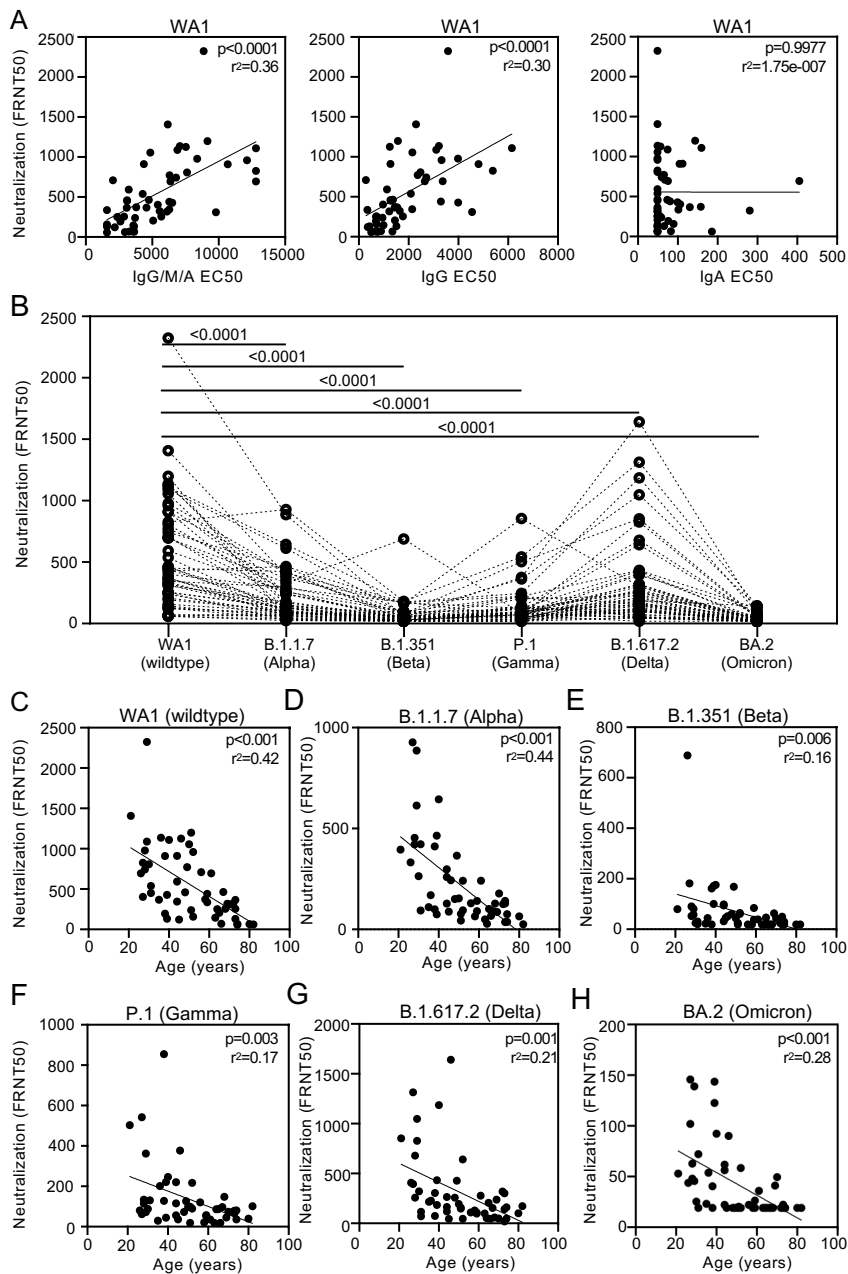

**Figure 1:** BNT162b2 induced IgG mediates age-dependent neutralization of wildtype and SARS-CoV-2 clinical variants. (A) Live SARS-CoV-2 neutralization (FRNT50) wildtype WA1 and receptor binding domain (RBD) specific IgG/M/A, IgG and IgA EC50 values (Supplemental Figure 1A) are plotted with relationship assessed by linear regression. (B) Neutralization of live SARS-CoV-2 wildtype WA1 and variants (Supplemental Figure 1B) are depicted with each dotted line representing a single individual and statistical significance calculated by Wilcoxon matched pair signed rank test. Live SARS-CoV-2 neutralization (FRNT50) for (C) wildtype (WT) and variants (D) B.1.1.7 (Alpha), (E) B.1.351 (Beta), (F) P.1 (Gamma), (G) B.1.617.2 (Delta) and (H) BA.2 (Omicron) and age in years are plotted with relationship assessed by linear regression and p values adjusted for sex.

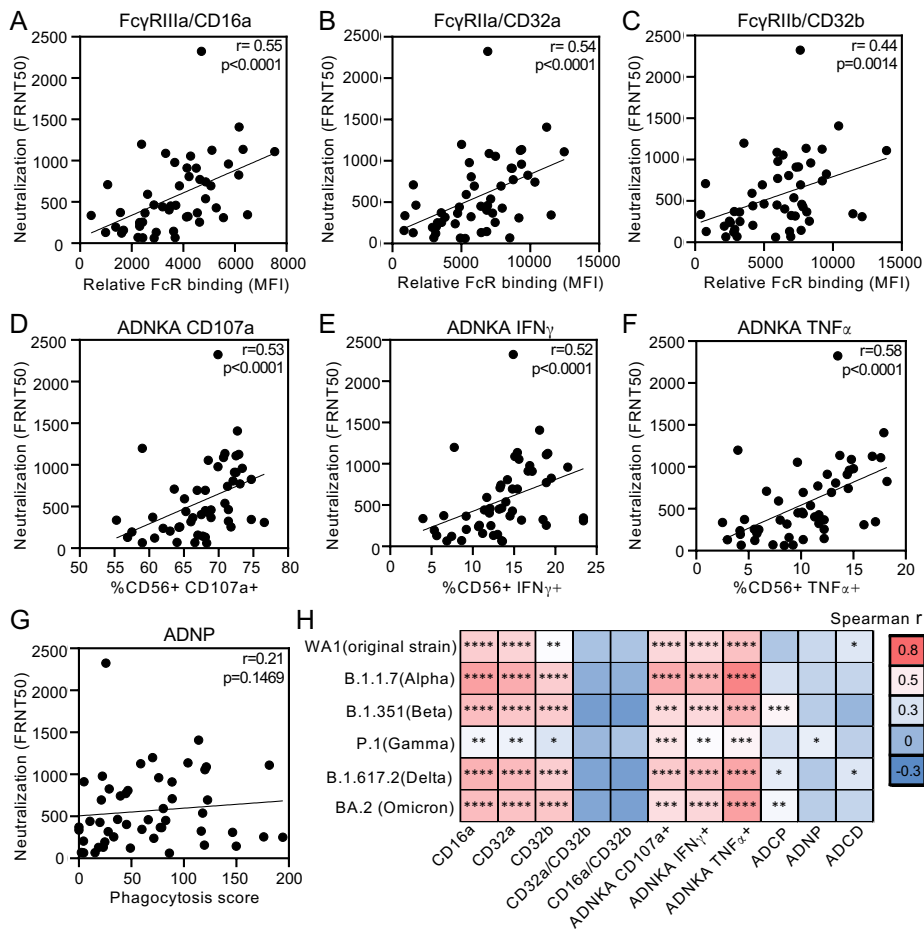

**Figure 2:** Vaccine specific IgG induction of FcγRIIIa/CD16 effector functions correlate with neutralization of wildtype and SARS-CoV-2 clinical variants. Relationships between live SARS-CoV-2 WA1 neutralization (FRNT50) and receptor binding domain (RBD) specific relative binding to (A) FcγRIIIa/CD16a, (B) FcγRIIIa/CD32a and (C) FcγRIIb/CD32b, RBD specific antibody dependent natural killer cell activation (ADNKA) determined by (D) CD107a expression, (E) IFN $\gamma$  production and (F) TNF $\alpha$  secretion, and (G) RBD specific antibody dependent neutrophil phagocytosis (ADNP) are shown. (H) Heatmap summarizes Spearman correlations (Supplemental Figure 2) between neutralization of SARS-CoV-2 wildtype WA1 and variants with relative binding of RBD specific IgG to activating (FcγRIIIa/CD16a and FcγRIIIa/CD32a), inhibitory (FcγRIIb/CD32b) and ratios of activating:inhibitory FcγR (FcγRIIIa/CD16a:FcγRIIb/CD32b and FcγRIIIa/CD32a:FcγRIIb/CD32b) binding and Fc effector functions ADNKA, antibody dependent cellular phagocytosis (ADCP), ADNP and antibody dependent complement deposition (ADCD). \*  $p \leq 0.05$ ; \*\*  $p \leq 0.01$ ; \*\*\*  $p \leq 0.001$ ; \*\*\*\*  $p \leq 0.0001$ .

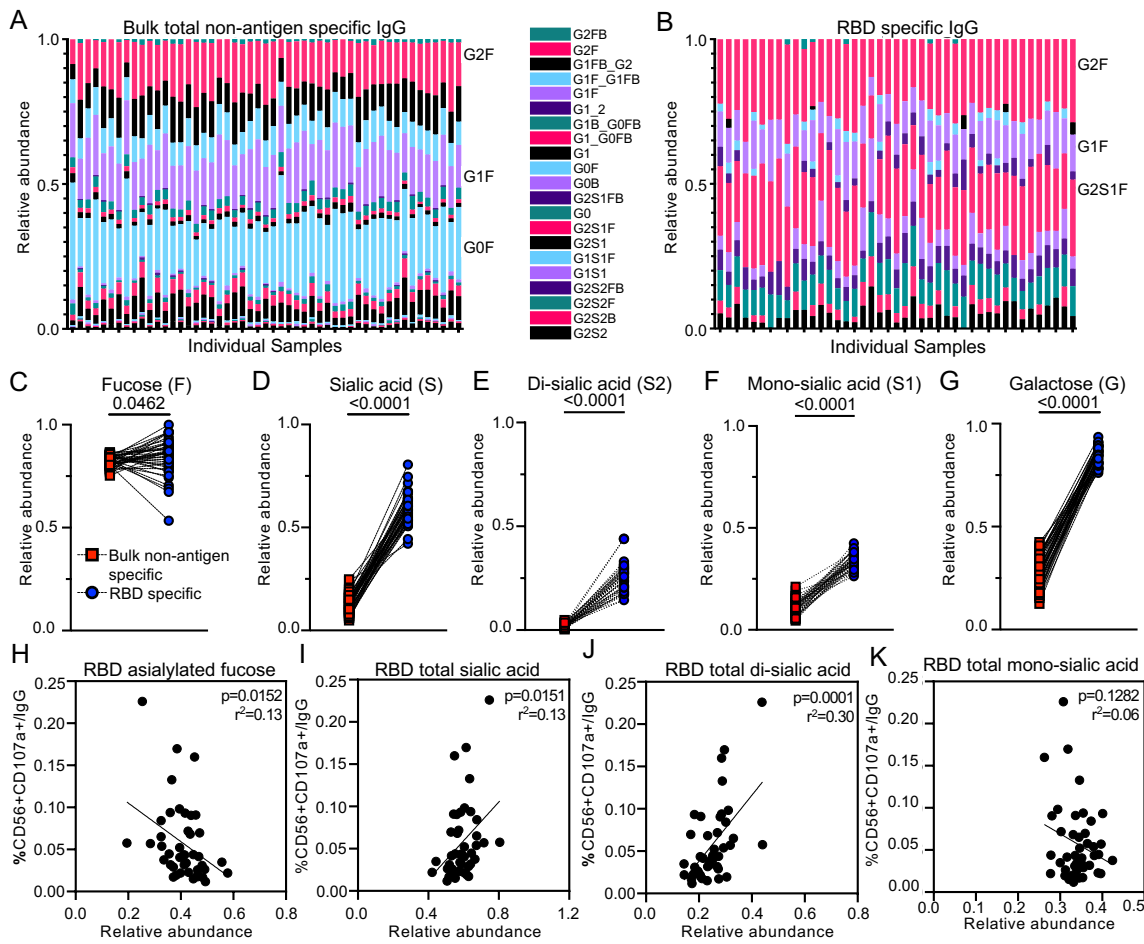

**Figure 3:** Differential fucose and sialic acid on vaccine specific IgG link to FcγRIIIa/CD16a effector functions. Stacked column graphs depict the relative abundance of individual glycoforms (Supplemental Figure 3A-B) with respect to (A) total bulk non-antigen specific and (B) receptor binding domain (RBD) specific IgG. Each column represents one individual study participant. Dot plots summarize differences between bulk non-antigen specific and RBD specific IgG in the collective relative abundance of all individual glycoforms (Supplemental Figure 3C and D) containing (C) fucose, (D) total sialic acid, (E) di-sialic acid, (F) mono-sialic acid and (G) di-galactose with statistical significance calculated by Wilcoxon matched-pairs signed rank test. Data for (H) asialylated fucosylated, (I) total sialic and (J) total di-sialic acid, the three RBD specific glycoforms that have a statistically significant relationship across all markers of ADNKA activation, are plotted with CD107a expression per RBD specific IgG, as well as IFNγ and TNFα (Supplemental Figure 4). For comparison, data for (K) total mono-sialic acid is plotted.

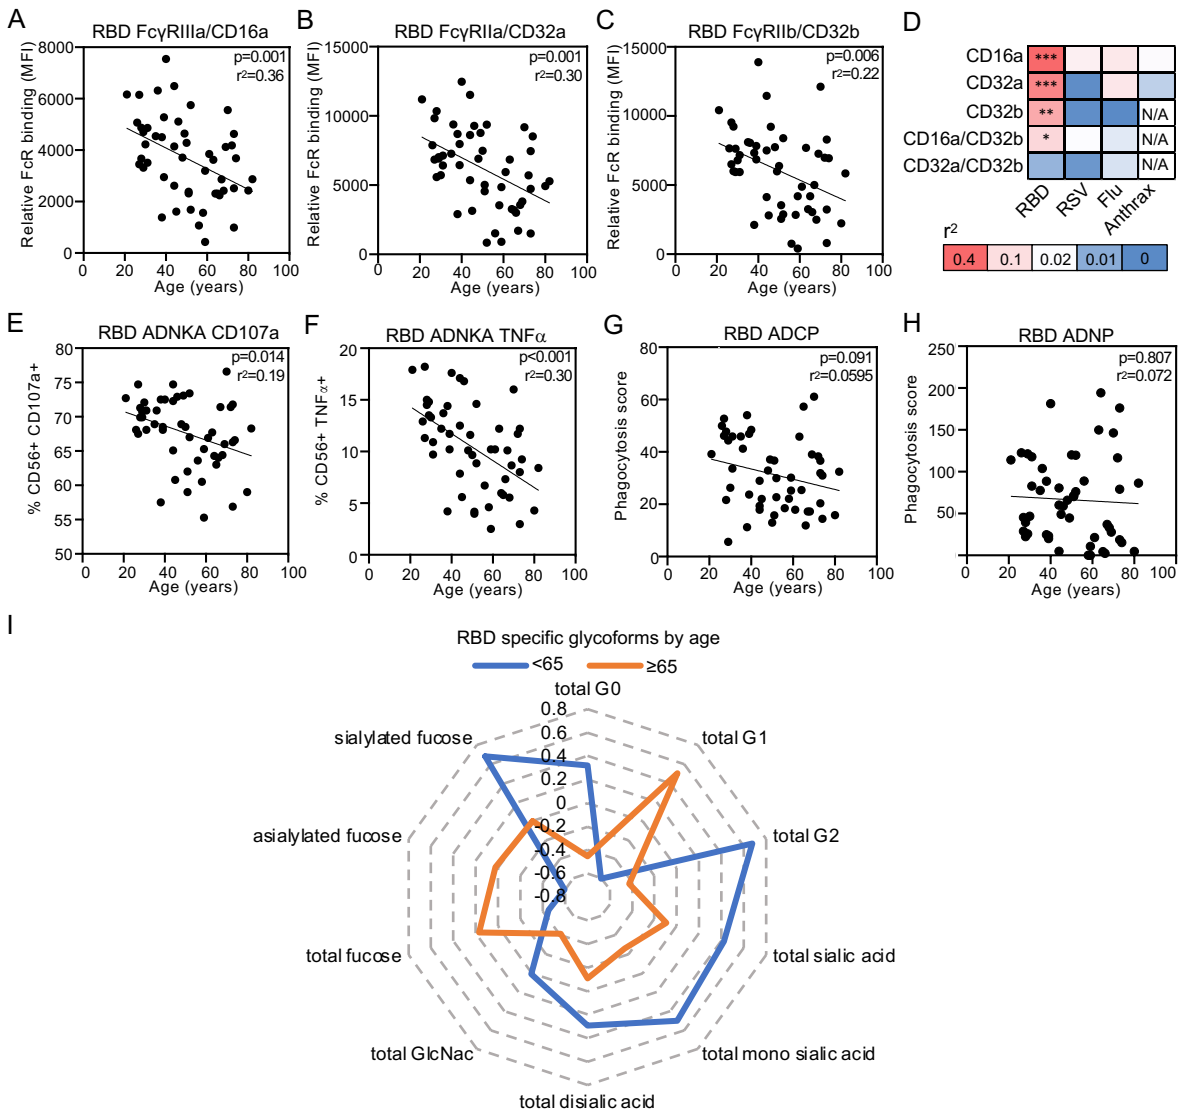

**Figure 4:** Age influences some but not all vaccine specific antibody Fc $\gamma$ R functions. The relationships between relative binding of receptor binding domain (RBD) specific IgG to (A) Fc $\gamma$ RIIIa/CD16a, (B) Fc $\gamma$ RIIa/CD32a and (C) inhibitory Fc $\gamma$ RIIb/CD32b and age are shown. (D) Heatmap of the coefficient of determination ( $r^2$ ) summarizes the goodness of fit across RBD and control respiratory syncytial virus (RSV), influenza (Flu) and anthrax antigens in Fc $\gamma$ R binding and age. \*  $p \leq 0.05$ ; \*\*  $p \leq 0.01$ ; \*\*\*  $p \leq 0.001$ ; N/A not available given absence of significant detectable levels. The relationship between age and RBD antibody dependent natural killer cell activation (ADNKA) as measured by (E) CD107a and (F) TNF $\alpha$ , and (G) RBD antibody dependent cellular phagocytosis (ADCP) and (H) RBD antibody dependent neutrophil phagocytosis (ADNP) are shown. Linear regression with  $p$  values adjusted for sex are reported. (I) Radar plots depict vaccine specific IgG glycoforms calculated from the Z scored data for each individual RBD specific IgG glycoforms relative to bulk non-antigen specific IgG glycoforms with lines representing the median for each age group.

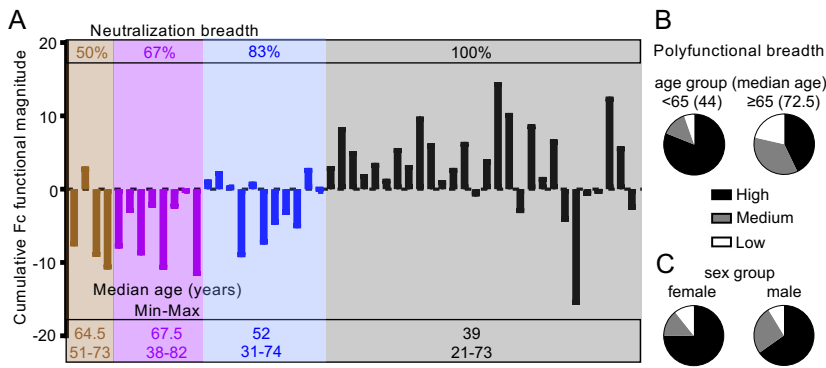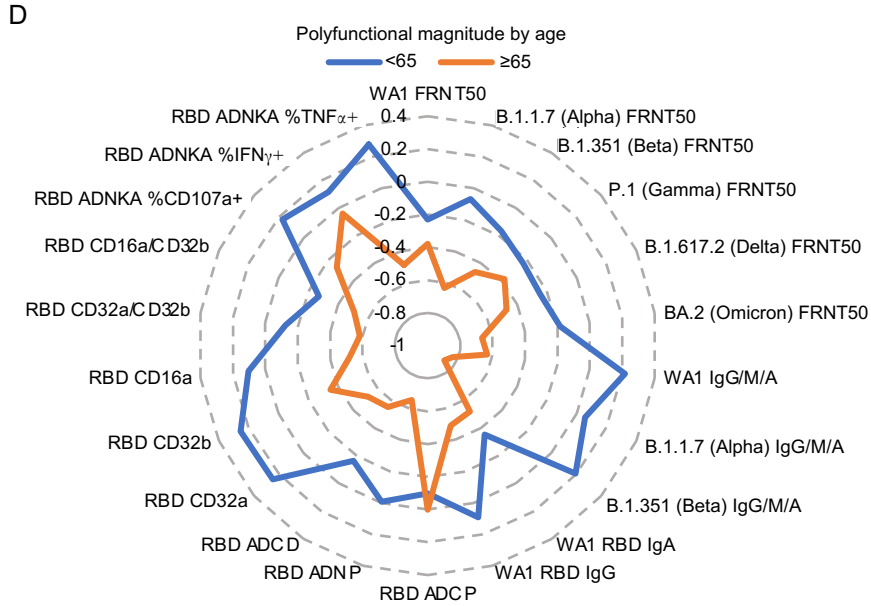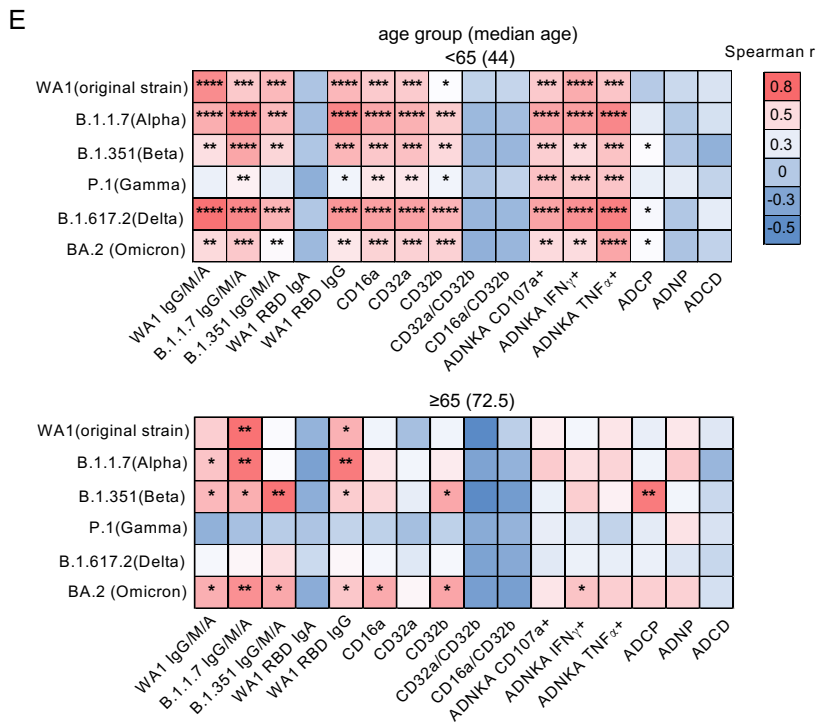

**Figure 5:** Enhanced BNT162b2 induced polyfunctional antibody breadth and magnitude against SARS-CoV-2 in younger compared to older adults. For each individual, the neutralization breadth across variants (Supplemental Figure 6A) and cumulative vaccine specific Fc functional magnitude from the sum of the Z scores for each of the individual effector functions (Supplemental Figure 6B) were calculated. (A) Grouped by neutralization breadth (top), each column shows the cumulative Fc functional score for one individual. Median, minimum and maximum ages characterizing each neutralization breadth group are shown (bottom). Polyfunctional antibody breadth was calculated for each individual (Supplemental Figure 6C) and used to categorize individuals into high (90-100%), medium (80-90%) or low (<80%) responders. The proportions of high, median and low responders are grouped by (B) age and (C) sex. (D) Radar plots depict vaccine specific polyfunctional antibody magnitude calculated from the Z scored data for each antibody function (Supplemental Figure 6C) with lines representing the median for each age group. (E) Heatmap summarizes Spearman correlations (Supplemental Figure 2) between neutralization of SARS-CoV-2 wildtype WA1 and variants with RBD specific IgG/M/A, IgG and IgA levels, relative binding of RBD specific IgG to activating (FcγRIIIa/CD16a and FcγRIIa/CD32a), inhibitory (FcγRIIb/CD32b) and ratios of activating:inhibitory FcγR (FcγRIIIa/CD16a:FcγRIIb/CD32b and FcγRIIa/CD32a:FcγRIIb/CD32b) binding and Fc effector functions antibody dependent natural killer cell activation (ADNKA), antibody dependent cellular phagocytosis (ADCP), antibody dependent neutrophil phagocytosis (ADNP) and antibody dependent complement deposition (ADCD) for each age group. \* p ≤ 0.05; \*\* p ≤ 0.01; \*\*\* p ≤ 0.001; \*\*\*\* p ≤ 0.0001.



| BNT162b2-vaccinated donors                            |                 |
|-------------------------------------------------------|-----------------|
| Characteristic                                        | Total (N=51)    |
| Median age                                            | 50 yo (21-82)   |
| Sex – no. (%)                                         |                 |
| Female                                                | 28 (54.9%)      |
| Male                                                  | 23 (45.1%)      |
| Median time between vaccine doses                     | 21 days (20-22) |
| Median time between second dose and sample collection | 14 days (14-15) |

Table: Demographics and vaccination status

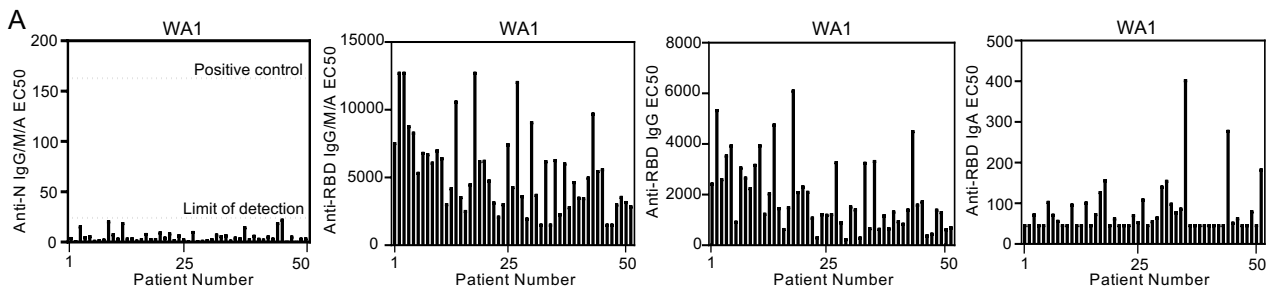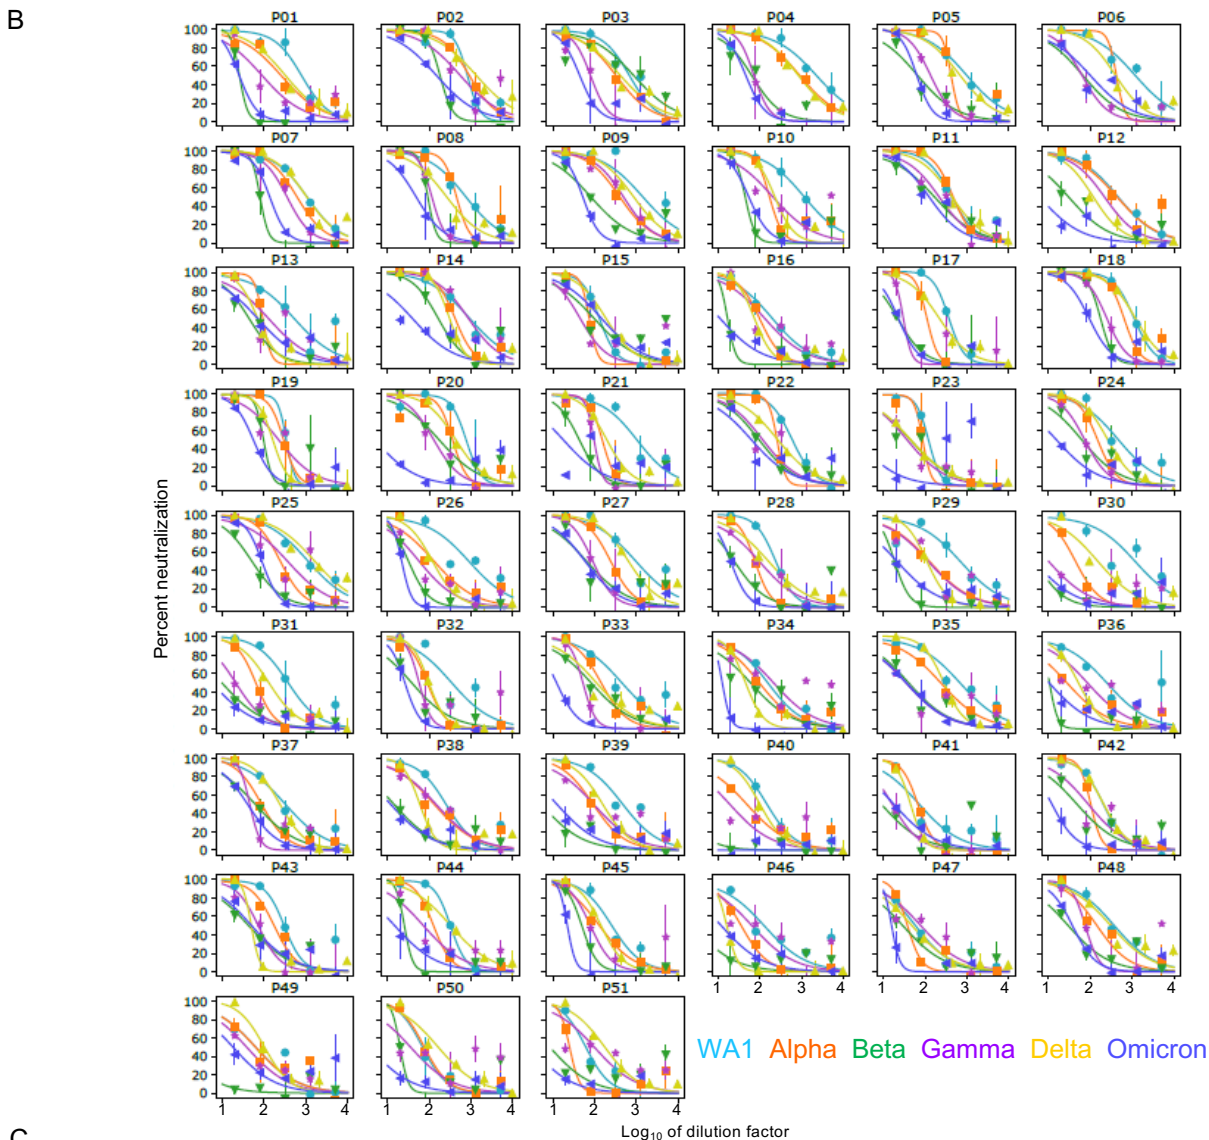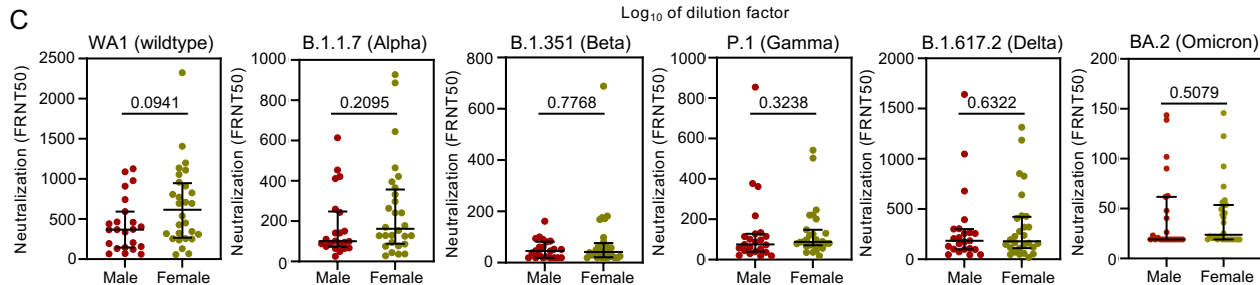

**D**

|            | WA1 (wildtype)<br>FRNT50 | B.1.1.7 (Alpha)<br>FRNT50 | B.1.351 (Beta)<br>FRNT50 | P.1 (Gamma)<br>FRNT50 | B.1.617.2 (Delta)<br>FRNT50 | BA.2 (Omicron)<br>FRNT50 |
|------------|--------------------------|---------------------------|--------------------------|-----------------------|-----------------------------|--------------------------|
| Spearman r | -0.6411                  | -0.6858                   | -0.5416                  | -0.4234               | -0.5227                     | -0.6119                  |
| p          | <0.0001                  | <0.0001                   | <0.0001                  | 0.0022                | <0.0001                     | <0.0001                  |

Supplemental Figure 1: BNT162b2 vaccination induces IgG mediated neutralization of SARS-CoV-2 wildtype (WT) and clinical variants that diminish with age but are not altered by sex. (A) EC50 values are depicted for each individual for Nucleocapsid (N) specific antibodies, receptor binding domain (RBD) specific antibodies, IgG and IgA. Each column represents one individual. (B) Neutralization graphs from focus forming assays to calculate FRNT50 for each SARS-CoV-2 WT and clinical variants are shown. Each graph shows the data for one individual. (C) Dot plots show the distribution of neutralization for SARS-CoV-2 WT and variants by sex with statistical significance calculated by Mann-U-Whitney. (D) Spearman correlation coefficients and statistical significance between age and neutralization for SARS-CoV-2 WT and clinical variants are shown.

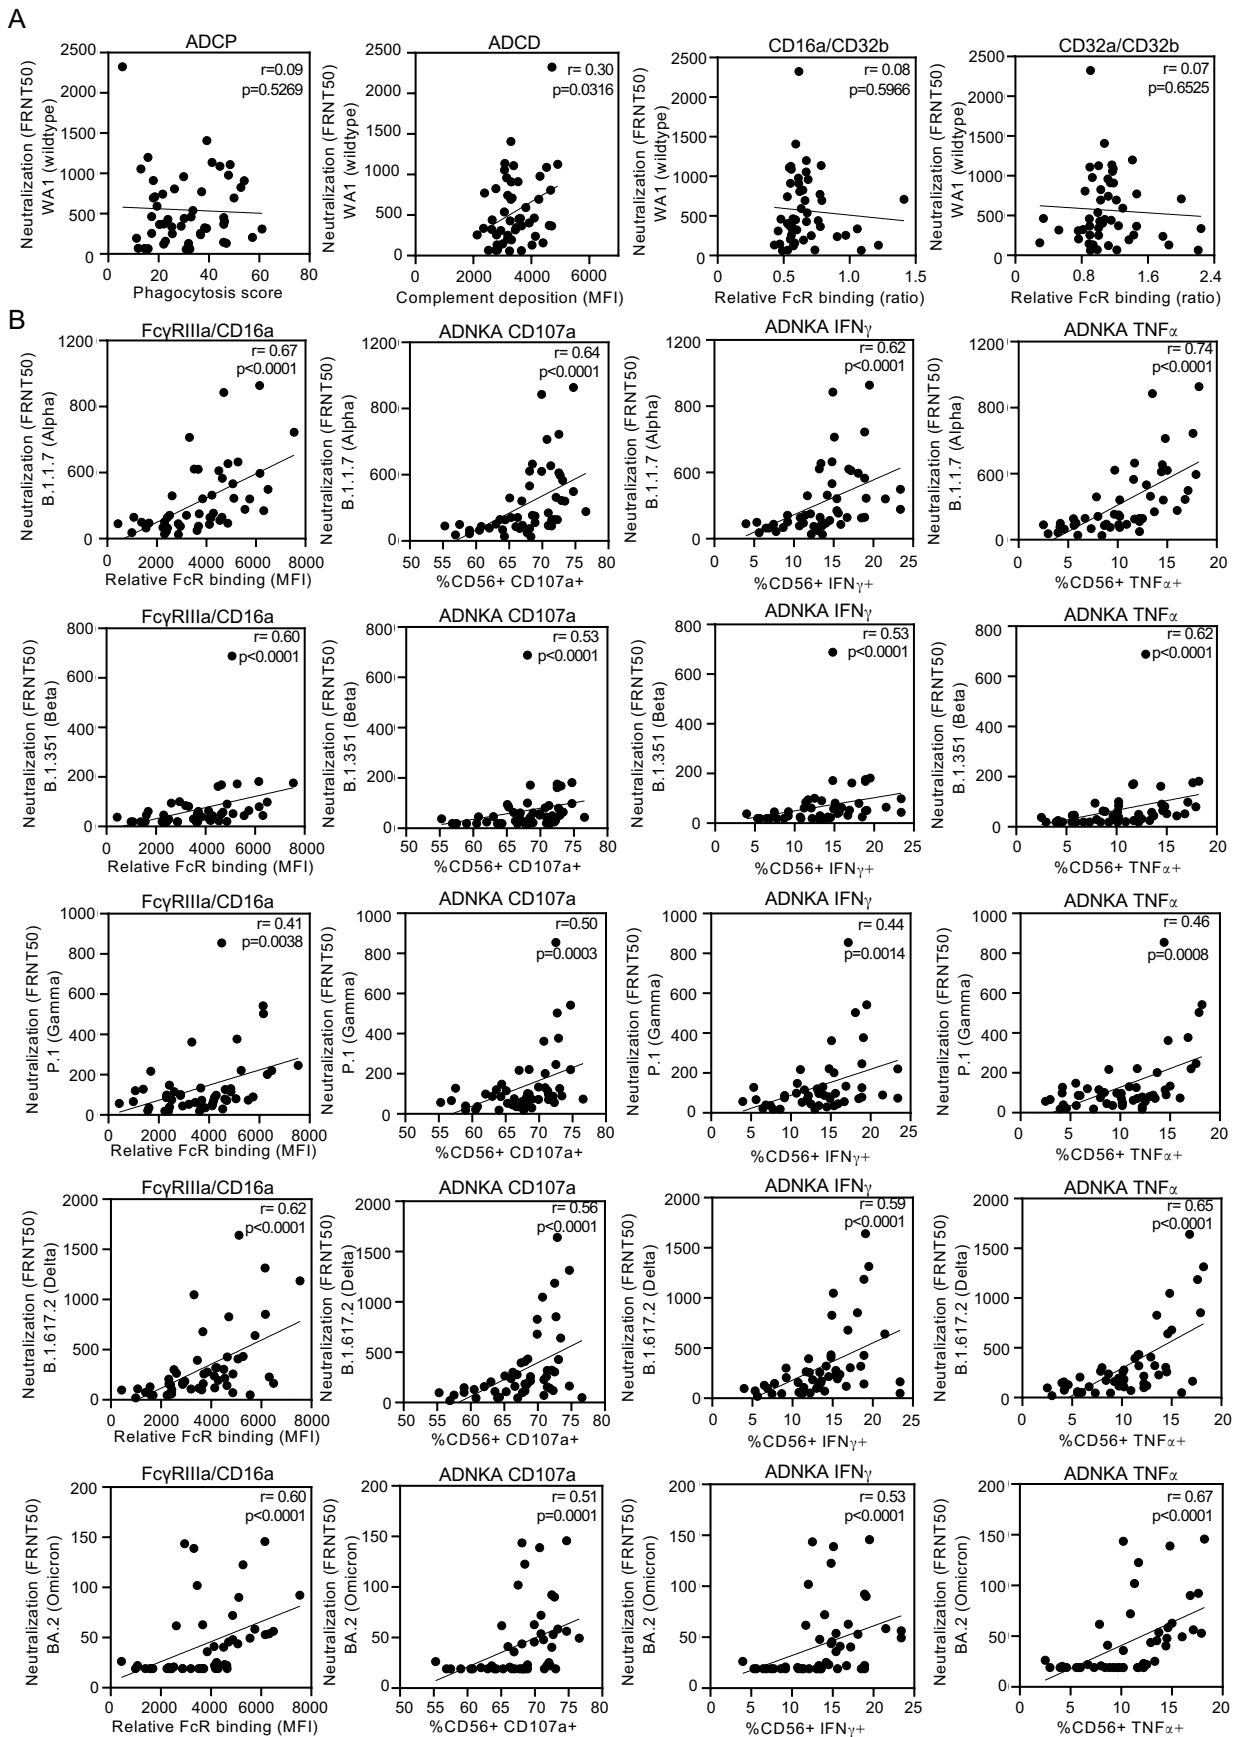

Supplemental Figure 2: Vaccine specific IgG induction of FcγRIIIa/CD16 effector functions correlate with neutralization of SARS-CoV-2 variants. (A) The relationships between live SARS-CoV-2 WA1 wildtype neutralization and RBD specific antibody dependent cellular phagocytosis (ADCP), and RBD specific antibody dependent complement deposition (ADCD), and receptor binding domain (RBD) specific relative binding ratios of activating:inhibitory FcγR FcγRIIIa/CD16a:FcγRIIb/CD32b, FcγRIIa/CD32a:FcγRIIb/CD32b are shown. (B) The relationships between live SARS-CoV-2 variants neutralization and RBD specific FcγRIIIa/CD16a binding and effector function antibody dependent natural killer cell activation (ADNKA) are depicted. Statistical significances were determined by Spearman correlation.

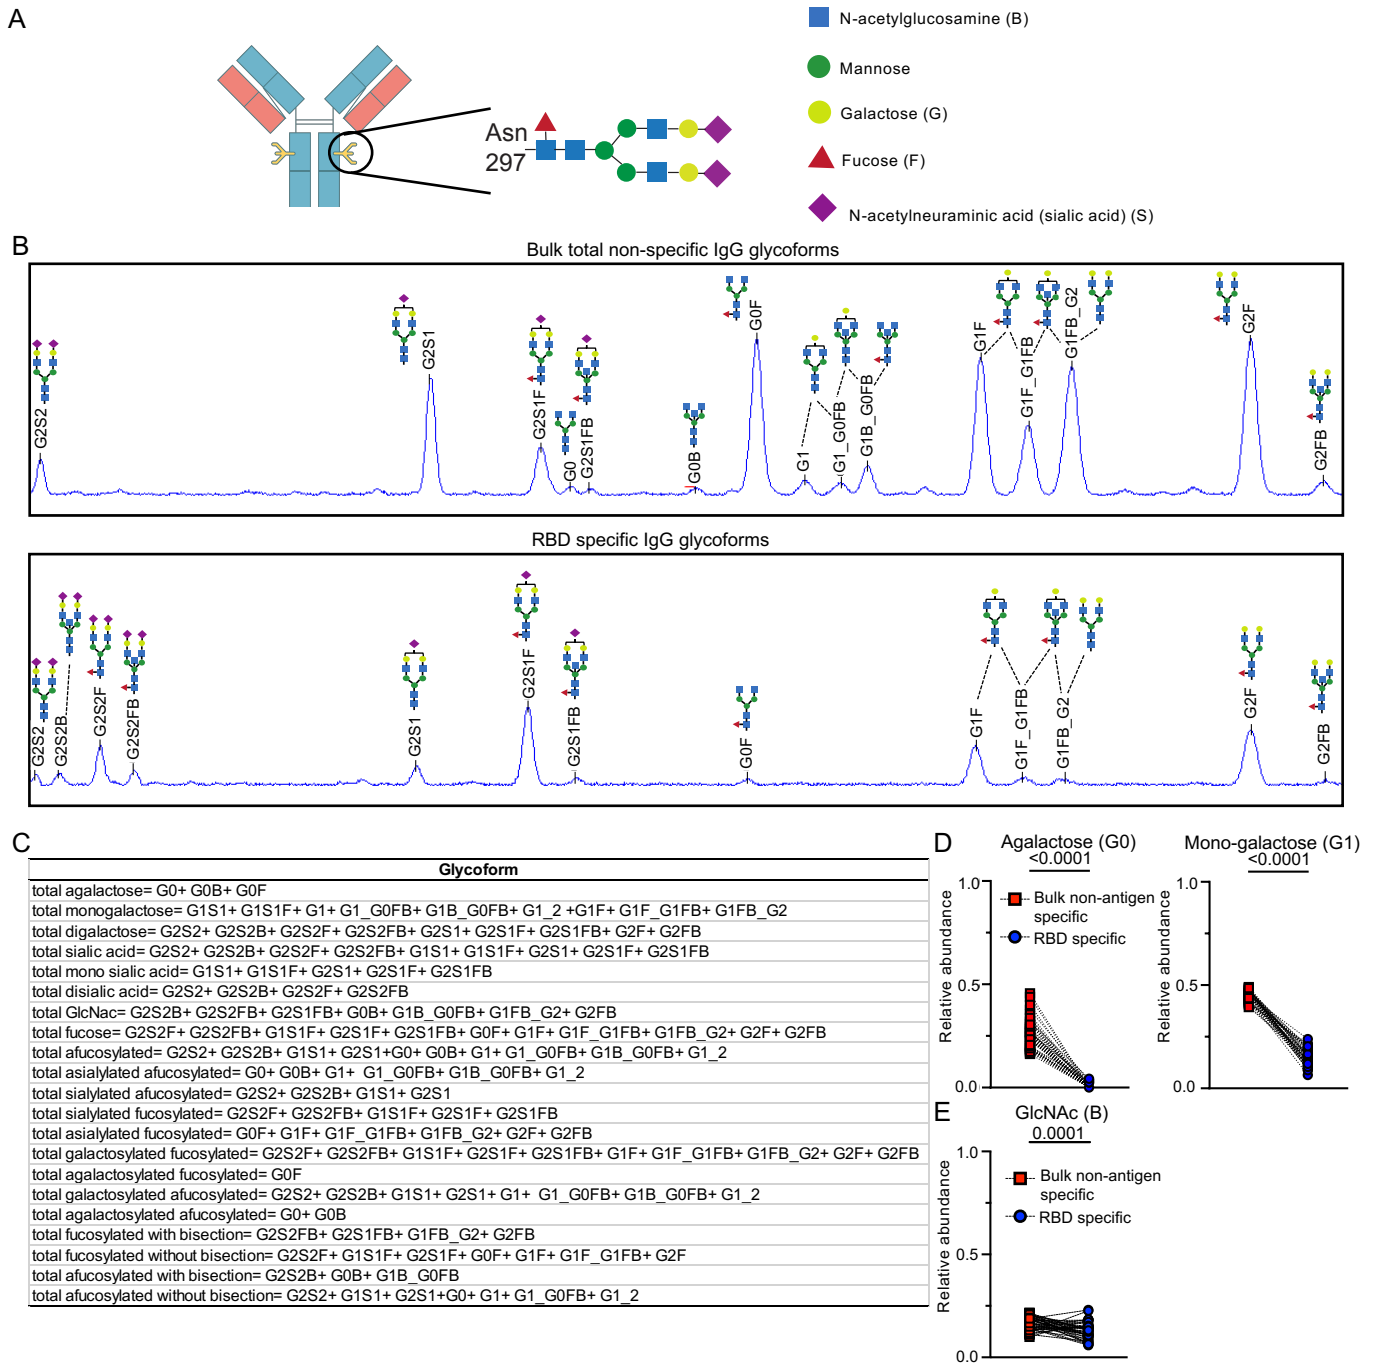

**Supplemental Figure 3: Bulk total non-antigen and vaccine specific IgG glycosylation patterns diverge.** (A) Human IgG1 contains a conserved Fc domain N297 residue on which a bi-antennary structure of N-acetylglucosamine (GlcNAc) and mannose resides. The subsequent addition and subtraction of galactose (G), fucose (F), N-acetylneuraminic acid (sialic acid) (S) and bisecting GlcNAc (B) contributes to post translational diversity that develops with antibody maturation through the Golgi and ER. (B) Capillary electrophoresis chromatographs for bulk total non-antigen and receptor binding domain (RBD) specific IgG glycans captured from one individual are shown. Quantification of each peak determines the relative abundance of each glycoform depicted. (C) The collective relative abundance of all individual glycoforms with fucose (F), sialic acid (S), galactose (G) and bisecting GlcNAc (B) are calculated for bulk total non-antigen and RBD specific IgG. Differences between bulk total non-antigen and RBD specific (D) agalactosylated and mono-galactosylated and (E) bisecting GlcNAc structures are shown. Statistical significances were calculated by Wilcoxon matched-pairs signed rank test.

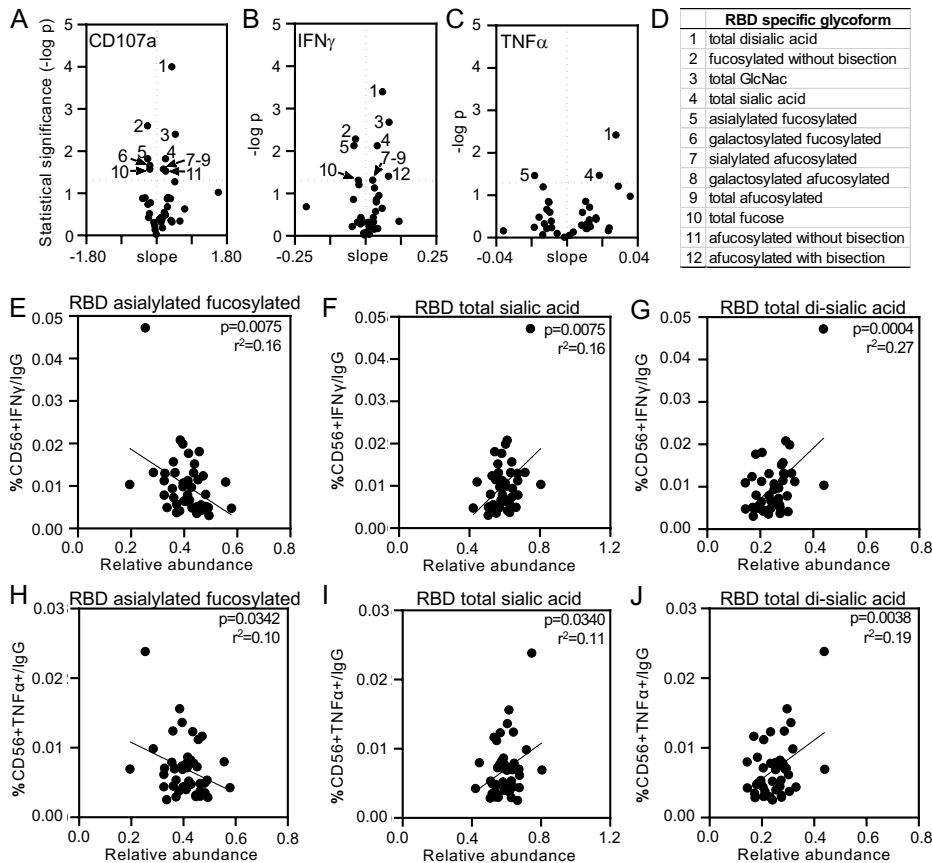

**Supplemental Figure 4:** Differential fucose and sialic acid on vaccine specific IgG link Fc $\gamma$ RIIIa/CD16a mediated IFN $\gamma$  and TNF $\alpha$  production. Volcano plots depict slope and statistical significance (-log p) from linear regression assessing the dependency of receptor binding domain (RBD) ADNKA by (A) % CD56 CD107a, (B) IFN $\gamma$  and (C) TNF $\alpha$  on different RBD specific IgG glycans. (D) Relationships where  $p < 0.05$  are enumerated and identified. Data for antibody dependent natural killer cell activation (ADNKA) markers of IFN $\gamma$  (middle row) and TNF $\alpha$  (bottom row) per RBD IgG and relative abundance of RBD specific (E and H) asialylated fucosylated, (F and I) total sialic and (G and J) total di-sialic acid are plotted. Statistical significances were evaluated by linear regression.

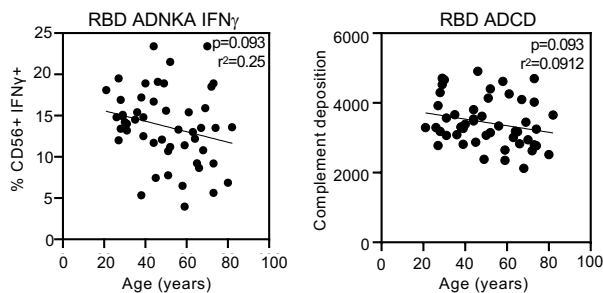

**Supplemental Figure 5:** Minimal relationship between age and vaccine specific antibody dependent complement deposition (ADCD). Receptor binding domain (RBD) specific C3 deposition and age are plotted (right panel). The relationship between age and RBD antibody dependent natural killer cell activation (ADNKA) as measured by IFN $\gamma$  are shown (left panel). Linear regression with p value adjusted for sex is reported.

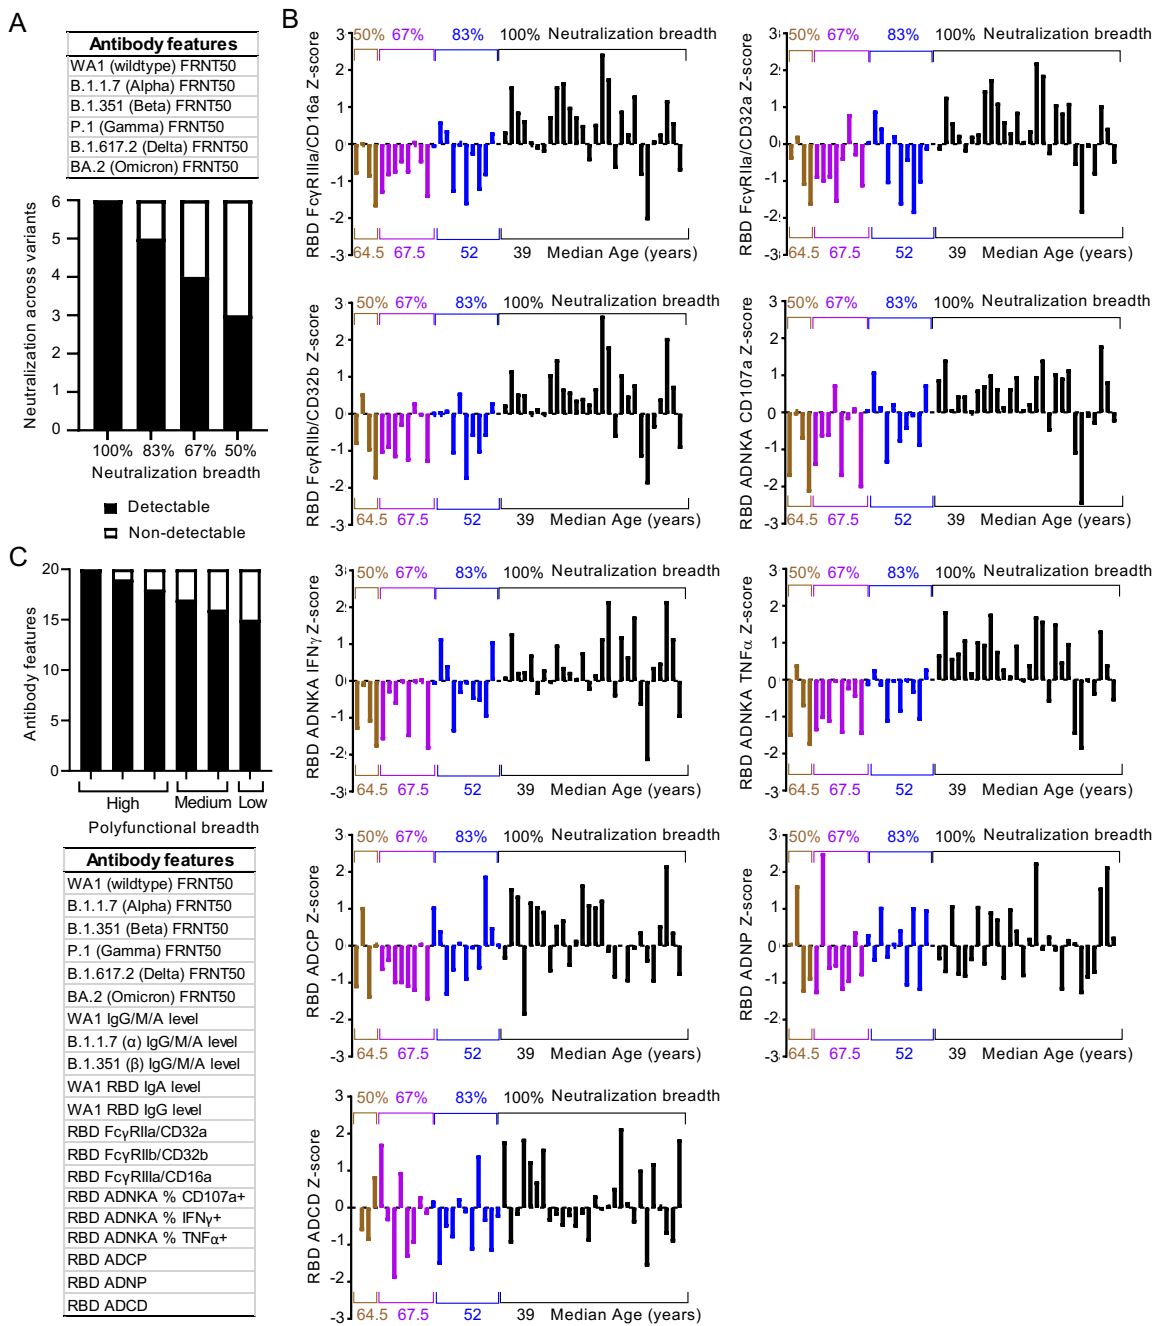

**Supplemental Figure 6: Antibodies function by the combination of Fab and Fc domains.** (A) Neutralization breadth across all 6 SARS-CoV-2 wildtype and clinical variants was calculated for each individual. In this cohort, individual responses fell into four main categories: those with detectable neutralizing activity for 100% of viruses tested, 83%, 67% and 50%. (B) Histograms depict the Z scored data for each vaccine specific Fc effector function tested. Each column represents one individual. Groupings are by neutralization breadth categories described in (A). (C) Vaccine specific polyfunctional breadth was calculated for each individual with all 20 vaccine specific features listed. In this cohort, individual responses fell into three main categories: those with high (90-100%), medium (80-90%) and low (<80%) of functions detected.
